# Supplementary material for: Accountable to whom, for what? An exploration of the early development of Clinical Commissioning Groups in the English NHS
Source: PubMed Central journal article supplement — BMJ Open. 2013 Dec 3;3(12):e003769. doi: 10.1136/bmjopen-2013-003769 (PMC3863120; doi:10.1136/bmjopen-2013-003769), 2013-12-03

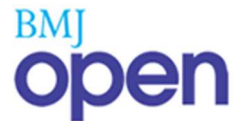

**Accountable to whom, for what? An exploration of the early development of Clinical Commissioning Groups in the English NHS**

|                                 |                                                                                                                                                                                                                                                                                                                                                                                                                                                                                                                                                                                                        |
|---------------------------------|--------------------------------------------------------------------------------------------------------------------------------------------------------------------------------------------------------------------------------------------------------------------------------------------------------------------------------------------------------------------------------------------------------------------------------------------------------------------------------------------------------------------------------------------------------------------------------------------------------|
| Journal:                        | <i>BMJ Open</i>                                                                                                                                                                                                                                                                                                                                                                                                                                                                                                                                                                                        |
| Manuscript ID:                  | bmjopen-2013-003769                                                                                                                                                                                                                                                                                                                                                                                                                                                                                                                                                                                    |
| Article Type:                   | Research                                                                                                                                                                                                                                                                                                                                                                                                                                                                                                                                                                                               |
| Date Submitted by the Author:   | 09-Aug-2013                                                                                                                                                                                                                                                                                                                                                                                                                                                                                                                                                                                            |
| Complete List of Authors:       | Checkland, Kath; University of Manchester, Centre for Primary Care<br>Allen, Pauline; LSHTM, Health Services Research Unit<br>Coleman, Anna; University of Manchester, Centre for Primary Care<br>Segar, Julia; University of Manchester, Centre for Primary Care<br>McDermott, Imelda; University of Manchester, Centre for Primary Care<br>Harrison, Stephen; University of Manchester, National Primary Care Research and Developmen; University of Manchester, Centre for Primary Care<br>Petsoulas, Christina; LSHTM, Health Services Research Unit<br>Peckham, Stephen; University of Kent, CHSS |
| <b>Primary Subject Heading</b>: | Health services research                                                                                                                                                                                                                                                                                                                                                                                                                                                                                                                                                                               |
| Secondary Subject Heading:      | Health policy, Qualitative research                                                                                                                                                                                                                                                                                                                                                                                                                                                                                                                                                                    |
| Keywords:                       | Health policy < HEALTH SERVICES ADMINISTRATION & MANAGEMENT, Organisation of health services < HEALTH SERVICES ADMINISTRATION & MANAGEMENT, Accountability, case study research, Clinical Commissioning Groups                                                                                                                                                                                                                                                                                                                                                                                         |
|                                 |                                                                                                                                                                                                                                                                                                                                                                                                                                                                                                                                                                                                        |

1  
2  
3  
4 **Accountable to whom, for what? An exploration of the early development of**  
5  
6  
7 **Clinical Commissioning Groups in the English NHS**  
8

9 **Kath Checkland, Pauline Allen, Anna Coleman, Julia Segar, Imelda McDermott, Stephen**  
10 **Harrison, Christina Petsoulas, Stephen Peckham.**  
11

12  
13 Dr Kath Checkland, Reader in Primary Care, Centre for Primary Care, University of Manchester,  
14 5<sup>th</sup> Floor, Williamson Building, University of Manchester Oxford Road, Manchester M13 9PL

15 Dr Pauline Allen, Reader in Health Policy, Department of Health Service Research and Policy,  
16 London School of Hygiene and Tropical Medicine, 15-17 Tavistock Place, London WC1H 9SH

17 Dr Anna Coleman, Research Fellow, Centre for Primary Care, University of Manchester, 5<sup>th</sup>  
18 Floor, Williamson Building, University of Manchester, Oxford Road, Manchester M13 9PL

19 Dr Julia Segar, Research Associate, Centre for Primary Care, University of Manchester, 5<sup>th</sup>  
20 Floor, Williamson Building, University of Manchester Oxford Road, Manchester M13 9PL

21 Dr Imelda McDermott, Research Associate, Centre for Primary Care, University of Manchester,  
22 5<sup>th</sup> Floor, Williamson Building, University of Manchester Oxford Road, Manchester M13 9PL

23 Prof Stephen Harrison, Professor of Social Policy, Centre for Primary Care, University of  
24 Manchester, 5<sup>th</sup> Floor, Williamson Building, University of Manchester Oxford Road, Manchester  
25 M13 9PL

26 Dr Christina Petsoulas, Research Fellow, Department of Health Service Research and Policy,  
27 London School of Hygiene and Tropical Medicine, 15-17 Tavistock Place, London WC1H 9SH

28 Prof Stephen Peckham, Professor of Health Policy, Centre for Health Services Studies,  
29 University of Kent, The Registry, Canterbury, Kent, CT2 7NZ  
30  
31

32  
33  
34 **Address for correspondence:**

35 **Dr Kath Checkland** Reader in Primary Care

36 Centre for Primary Care

37 Institute of Population Health

38 5<sup>th</sup> Floor, Williamson Building

39 University of Manchester

40 Oxford Road

41 Manchester M13 9PL

42 [Katherine.checkland@manchester.ac.uk](mailto:Katherine.checkland@manchester.ac.uk)  
43  
44  
45  
46  
47  
48  
49  
50  
51  
52  
53  
54  
55  
56  
57  
58  
59  
60

## Declarations

### *Authorship*

All of the authors meet the criteria for authorship, and were involved in the design and data analysis of the study, and contributed to the drafting, revision and finalization of this paper. In addition, Julia Segar, Anna Coleman, Imelda McDernott, Christina Petsoulas and Kath Checkland took part in the data collection.

Ms Ros Miller and Dr Andrew Wallace (contributors) also took part in the data collection and analysis, and contributed to the final project report.

### *Competing Interests*

All of the authors received grant funding from the Department of Health via its Policy Research Programme for this research. No authors have had financial relationships with any organisations that might have an interest in the submitted work in the previous three years, and no authors have any other relationships or activities that could appear to have influenced the submitted work.

### *Acknowledgements*

The study was funded by the Department of Health via its Policy Research Programme. The study formed part of the programme of the Policy Research Unit on Commissioning and the Healthcare System. The views expressed here are those of the researchers and do not reflect the position of the Department of Health.

We are grateful to our participants who were very generous in allowing us access to their organisations at a time of considerable turmoil and change. A project advisory group provided valuable advice and support in the development and management of the study. We are grateful to Ros Miller and Andrew Wallace who undertook much of the fieldwork for us and who contributed to the analysis and final report.

Employees of the Department of Health were members of an advisory group which supported the conduct of the research, and commented on an initial draft of the study final report, but the findings are those of the authors. A draft of this paper was submitted to the Department of Health at the same time as it was submitted to the journal.

### *Ethical approval*

The study received ethical approval from NRES NW ref 0375.

## Summary

### Article focus

It is claimed by the architects of the current reorganisation of the English NHS that the changes will increase accountability across the service. This article explores how this is playing out in practice, focusing upon the accountabilities to which newly formed Clinical Commissioning Groups (CCGs) are subject.

### Key messages

- The accountability arrangements for CCGs are considerably more complex than those experienced by their predecessor organisations, with multiple external accountabilities as well as internal accountability to members.
- There is potential for conflict between the different accountabilities, and it is unclear how far the aspiration for 'greater accountability' can be met
- This study is important, as it provides the first evidence about how CCGs are beginning to tackle their complex and developing role. It raises questions which future research must address.

### Strengths and limitations

This study took place during the early phases of CCG establishment, and therefore provides a snap shot of a developing situation. However, the data collected were wide and deep, and the findings therefore provide a robust picture of the developing landscape of CCG accountability.

### Data sharing

There is no additional data available.

# Accountable to whom, for what? An exploration of the early development of Clinical Commissioning Groups in the English NHS

## *Abstract*

*Objective:* One of the key goals of the current reforms in the English NHS under the Health and Social Care Act, 2012, is to increase the accountability of those responsible for commissioning care for patients (Clinical Commissioning Groups (CCGs)), whilst at the same time allowing them greater autonomy. This study set out to explore CCG's developing accountability relationships.

*Design:* We carried out detailed case studies in eight CCGs, using interviews, observation and documentary analysis to explore their multiple accountabilities.

*Setting/participants:* We interviewed GPs, managers and Governing Body members in developing CCGs, and observed a wide variety of meetings.

*Results:* CCGs are subject to a managerial, sanction-backed accountability to NHS England (the highest tier in the new organisational hierarchy), alongside a number of other external accountabilities to the public and to some of the other new organisations created by the reforms. In addition, unlike their predecessor commissioning organisations, they are subject to complex internal accountabilities to their members.

*Conclusions:* The accountability regime to which CCGs are subject is considerably more complex than that which applied their predecessor organisations. It remains to be seen whether the twin aspirations of increased autonomy and increased accountability can be realised in practice. However, this early study raises some important issues and concerns, including the risk that the different bodies to whom CCGs are accountable will have differing (or conflicting) agendas, and the lack of clarity over the operation of sanction regimes.

## Introduction

‘The Government’s reforms will liberate professionals and providers from top-down control. This is the only way to secure the quality, innovation and productivity needed to improve outcomes. We will give responsibility for commissioning and budgets to groups of GP practices; and providers will be freed from government control to shape their services around the needs and choices of patients. Greater autonomy will be matched by increased accountability to patients and democratic legitimacy, with a transparent regime of economic regulation and quality inspection to hold providers to account for the results they deliver.’<sup>1</sup>

Having initially promised ‘no more top-down reorganisations of the NHS’<sup>2</sup>, the UK Coalition Government elected in 2010 immediately embarked on a radical overhaul of the NHS in England (the NHSs in Wales, Scotland and Northern Ireland are governed by the devolved authorities), with a reorganisation that affects most parts of the service. As this quote suggests, the driving force behind the reforms was a desire to ‘liberate’ professionals from top-down control, at the same time as making them more accountable. In brief, the changes maintain and extend the notion of a ‘quasi-market’ in the NHS, first introduced in the 1990s<sup>3</sup>. Overall responsibility for running the NHS has been removed from the Department of Health (DH) and handed to a new arm’s length body, NHS England<sup>1</sup>. Responsibility for commissioning (purchasing) the majority of services for a defined geographical population was historically held by Primary Care Trusts (PCTs). These organisations were managerially dominated, and were directly accountable to the Department of Health (ie the Health Ministry). The Health and Social Care Act<sup>4</sup> abolished PCTs (from 1/4/13), passing responsibility for commissioning to primary care physicians (General Practitioners, GPs) working together in local Clinical Commissioning Groups (CCGs). These groups were established as statutory bodies from 1/4/13, and are now responsible for 65% of the overall budget of the NHS, covering a defined geographical area and commissioning routine and emergency care. NHS England (NHSE) will oversee CCGs, and will

---

<sup>1</sup> This body was initially called ‘the NHS Commissioning Board’ (NHSCB), but just prior to its formal establishment this was changed to NHS England. .

1  
2  
3 be responsible for commissioning some services (eg primary care, specialised services) at a  
4 national level. Managerial budgets for CCGs will be significantly less than was the case for  
5 PCTs, and they will be expected to ‘buy in’ managerial commissioning support from standalone  
6 organisations, known as ‘Commissioning Support Units’ (CSUs)<sup>5</sup>. Further regulation will be  
7 provided by Monitor, which is an arm’s length government body originally established to  
8 regulate quasi-independent NHS hospitals known as ‘Foundation Trusts’<sup>6</sup>. Monitor now has an  
9 expanded role as economic regulator of the new NHS system, responsible for the prevention of  
10 anti-competitive behaviour, the promotion of integration, setting prices within the system and  
11 ensuring service continuity. Responsibility for Public Health is transferred to Local Government  
12 Authorities (LAs), and new LA sub-committees known as Health and Well-being Boards (HWB)  
13 have been created, charged with setting the over-arching strategic direction for health and social  
14 care services across a geographical area. CCGs will be members of these bodies, and will be  
15 expected to set their own priorities in response to the strategic direction set by their local HWB.  
16  
17  
18  
19  
20  
21  
22  
23  
24  
25  
26  
27  
28  
29  
30  
31  
32  
33

34 Thus, the new system creates a number of new bodies with significant responsibilities,  
35 and redefines relationships in significant ways, with an associated increase in complexity. This  
36 increase in complexity in part has come about because of the continued commitment by the UK  
37 government to the idea of a market in healthcare, a commitment shared by other governments  
38 across the world. However, markets require regulation, and recent scandals in England have  
39 demonstrated just how difficult that regulation can be. One of the official aspirations  
40 underpinning the creation of CCGs in England (as demonstrated by the quotation opening this  
41 article) is to enable greater accountability, and it is clear from the brief description given above  
42 that the success of the new system will, to some extent, depend upon how successfully the new  
43 accountability relationships are established. However, in spite of very extensive documentation  
44 issued to guide CCGs as they established themselves (see  
45  
46  
47  
48  
49  
50  
51  
52  
53  
54  
55  
56  
57  
58  
59  
60

1  
2  
3 <http://www.england.nhs.uk/resources/resources-for-ccgs/>, accessed June 2013) the exact nature  
4  
5 of CCG accountability relationships remains ill-defined and somewhat unspecified. One of the  
6  
7 key guidance documents issued to CCGs was a guide to governance processes (NHS  
8  
9 Commissioning Board 2012f). Accountability is referred to thus:  
10  
11

12  
13 CCGs will have to **account to the patients and population** they serve as well as  
14 **being accountable to the NHS Commissioning Board (NHS England)**. This  
15 will require a comprehensive and effective patient and public engagement strategy  
16 with systems and processes to assure the governing body that this is taking place  
17 throughout the organisation. They will need to play a full role on their local  
18 Health and Wellbeing Boards including co-operating, in preparing joint strategic  
19 needs assessments, and agreeing a joint Health and Wellbeing Strategy. They will  
20 also **work in partnership with Local Authorities** and (as members of the Health  
21 and Wellbeing Boards) have a role in encouraging **health and social care**  
22 **commissioners** with the aim of securing better integrated health and social care  
23 for their patients. They will have a responsibility to ensure that **relevant health**  
24 **and care professionals** are involved in the design of services and **that patients**  
25 **and the public** are actively involved in the commissioning arrangements<sup>7</sup> p4  
26  
27 (emphasis added).  
28  
29  
30  
31

32 This paragraph indicates potential complexities facing CCGs, referring to a number of different  
33 audiences and stakeholders. However, it is silent about the mechanics of the various  
34 accountability relationships, and provides no advice as to how any conflicts between them might  
35 be resolved.  
36  
37  
38  
39

40  
41 This paper uses evidence from a study of the early development of CCGs to explore how  
42 claims to increased accountability might play out in practice. We examine CCG constitutional  
43 documents, interviews with CCG leaders and observation of CCG meetings to explore how  
44 CCGs are interpreting their accountabilities and how the new system is developing in practice.  
45  
46 Although it is early days, and the full effect of the various accountability relationships will not  
47 become clear for some time, we believe that it is valuable to highlight developing complexities  
48 and potential issues at this point.  
49  
50  
51  
52  
53  
54  
55  
56  
57  
58  
59  
60



1  
2  
3  
4  
5  
6  
7  
8  
9  
10  
11  
12  
13  
14  
15  
16  
17  
18  
19  
20  
21  
22  
23  
24  
25  
26  
27  
28  
29  
30  
31  
32  
33  
34  
35  
36  
37  
38  
39  
40  
41  
42  
43  
44  
45  
46  
47  
48  
49  
50  
51  
52  
53  
54  
55  
56  
57  
58  
59  
60

What follows is divided into five sections. A short discussion of the relevant dimensions of ‘accountability’ is followed by a more detailed account of the obligations and roles given to CCGs under the Health and Social Care Act 2012<sup>4</sup>. A description of our methods is followed by results and discussion, with a final section summarising the implications of our findings.

### ***Definitions of accountability***

Mulgan<sup>8</sup> describes accountability as a ‘complex and chameleon-like term’ (p555), describing the extension of the idea beyond an original concern with being ‘called to account’ by some legitimate authority, to incorporate a multitude of additional concepts such as internal notions of personal responsibility and professional accountability to peers. Ryan and Walsh<sup>9</sup> argue that, driven by the so-called ‘new public management’ approach<sup>10</sup>, accountability in the public sector is particularly complex, with actors in public sector organisations being potentially accountable to multiple audiences, including an informed public as well as to ministers. In order to make sense of this complexity, in this paper we will use definition suggested by Bovens<sup>11</sup>: ‘[accountability is] a relationship between an actor and a forum, in which the actor has an obligation to explain his or her conduct, the forum can pose questions and pass judgement, and the actor may face consequences’. This definition brings into focus the notion of authority, alongside the potential for judgement and sanctions. However, it leaves open the currency of accountability: for what aspects of his/her ‘conduct’ must an actor answer? A number of authors have addressed this question<sup>12-14</sup>. Leat<sup>15</sup> offers a fourfold classification: fiscal accountability, focusing upon expenditure and financial probity; process accountability, exploring the adequacy of procedures for decision making; accountability for priorities, providing justification for the way in which an organisation has focused its activities; and programme accountability, by which an actor is held to account for the outcomes of their activity. Turning to the question of sanctions, Brinkerhoff<sup>12</sup> sketches the idea of a spectrum, from accountability as the provision of

1  
2  
3 information about an organisation's actions at one end, through the additional requirement to  
4  
5 justify those actions, to a sanction-backed formal 'answerability', in which different types of  
6  
7 sanctions may be enforced in order to ensure compliance, at the other. This provides a useful lens  
8  
9 through which to consider the strength of any particular accountability relationship.  
10  
11

12  
13 Accountability thus defined encompasses both what Day and Klein<sup>16</sup> call 'managerial  
14  
15 accountability'; that is, accountability as a largely technical process, by which those with  
16  
17 delegated authority are held to account against clearly specified criteria, agreed in advance and  
18  
19 'political accountability', by which those with delegated authority are answerable for their  
20  
21 actions to the public. In this latter form of accountability, the criteria for judgment are  
22  
23 themselves subject to debate, and it is characterised by reasons, justification and explanations of  
24  
25 behavior (ibid p26), rather than by technical assessment against specified criteria. Such  
26  
27 accountability is rarely backed by any form of sanctions other than the possibility that those  
28  
29 involved might be subject to a democratic process or public opprobrium. In the real world,  
30  
31 simple separation between these two forms of accountability rarely exists,<sup>16</sup> p28, but the  
32  
33 distinction remains analytically useful, as it provides a framework within which to think about  
34  
35 public accountability, which is rarely tied to specific performance criteria (unlike managerial  
36  
37 accountability). Furthermore, political accountability carries the possibility that moral and ethical  
38  
39 dimensions of performance might be incorporated into the accountability framework.  
40  
41  
42  
43  
44

45  
46 Taking these definitions together, four key questions emerge. Firstly, any study of  
47  
48 accountability must ask 'to whom are these actors accountable?' Secondly, we can ask:  
49  
50 'accountable for what?', exploring the different types of activities and outcomes which might be  
51  
52 tested. Thirdly, we need to explore how far particular accountabilities are underpinned by  
53  
54 sanctions, and what enforcement mechanisms exist. Finally, following Day and Klein<sup>16</sup>, it is  
55  
56 important to distinguish between a managerial accountability, in which the criteria of judgment  
57  
58  
59  
60

1  
2  
3 are relatively clear, and political accountability, in which the key is producing a plausible  
4  
5 argument about actions and decisions.  
6  
7

### 8 ***The role and functions of Clinical Commissioning Groups***

9  
10 Since the introduction of the quasi-market into the NHS there has been an ambition to involve  
11  
12 front line primary care physicians more closely in purchasing care for their patients. Examples  
13  
14 include: GP fundholding, Total Purchasing Pilots, GP Commissioning groups, Primary Care  
15  
16 Groups and Practice-based Commissioning <sup>17</sup>. Each of these previous attempts at involving  
17  
18 clinicians in commissioning shares one thing: alongside the clinical group there existed an  
19  
20 administrative body (initially the Health Authority, latterly the PCT) to take statutory and  
21  
22 financial responsibility. Under the HSCA 2012, no such administrative support exists, with  
23  
24 CCGs taking on full statutory responsibility from April 2013. From this date, CCGs have been  
25  
26 responsible for planning, agreeing, procuring and monitoring a full range of services for their  
27  
28 populations. The exact distribution of commissioning responsibilities between CCGs and other  
29  
30 new bodies, such as NHS England, is complex, but essentially CCGs are responsible for most  
31  
32 elective, urgent and community care <sup>18</sup>. In addition, they are responsible for improving the  
33  
34 quality of primary care services, and are under a duty to work co-operatively with the LA <sup>19</sup>.  
35  
36 Finally, they are under a duty to break even financially, and carry responsibility for ensuring that  
37  
38 they meet their obligations with regard to safeguarding children and other general duties such as  
39  
40 complying with Equalities legislation  
41  
42  
43  
44  
45  
46  
47

### 48 ***Methods***

49  
50 The study took place between September 2011 and June 2012. Data collection involved both in  
51  
52 depth case studies in 8 emerging CCGs<sup>2</sup>, and national web surveys carried out at two points in  
53  
54  
55  
56

57  
58 <sup>2</sup> CCGs are not formally established until they have been through the authorisation process. At the time of this  
59 research, CCGs were technically sub-committees of their local PCT, and should properly be referred to as  
60

time (December 2011 and April 2012). In this paper we focus upon the results from the qualitative case studies. For a full description of the methods see Checkland et al<sup>20</sup>

The 8 case study sites were selected to provide maximum variety across a number of characteristics, including: size; the homogeneity of the socio-demographic profile of the site; and the complexity of the local health economy and local government institutions.

Table 1: Site characteristics

| Site   | Size (quintile) | Socio-demographic profile                                | Major providers | Local Authorities |
|--------|-----------------|----------------------------------------------------------|-----------------|-------------------|
| Site 1 | 3               | Mixed                                                    | 1               | >1                |
| Site 2 | 5               | Relatively homogeneous, pockets of deprivation           | > 1             | 1                 |
| Site 3 | 5               | Relatively homogeneous, affluent, pockets of deprivation | > 1             | >1                |
| Site 4 | 2               | Relatively homogeneous, deprived                         | > 1             | 1                 |
| Site 5 | 3               | Relatively homogeneous, deprived                         | 1               | >1                |
| Site 6 | 2               | Relatively homogeneous, affluent                         | 1               | 1                 |
| Site 7 | 4               | Mixed                                                    | > 1             | 1                 |
| Site 8 | 4               | Mixed                                                    | 1               | 1                 |

The smallest sites covered a population of 88,000-138,000, whilst the largest were responsible for a population of >500,000. Data collection involved observation of a wide variety of different types of meetings, semi-structured interviews and analysis of available documents such as meeting minutes, strategy plans and draft constitutions. In total we observed 439 hours of meetings and carried out 96 interviews (see table 2). Meetings included, for example, CCG Governing Body meetings, working group meetings, and meetings of the local Health and Wellbeing Board.

---

emerging', 'aspirant' or 'Pathfinder' CCGs. However, in order to make the paper more readable, the term 'emerging' is omitted, using the shorthand of 'CCG' to refer to the groups putting themselves forward for authorisation.

Table 2: Interviews

| Type of respondent              | Number interviewed | Number of interviews (some interviewed twice) |
|---------------------------------|--------------------|-----------------------------------------------|
| Managers (NHS)                  | 47                 | 49                                            |
| GPs                             | 33                 | 36                                            |
| Lay members                     | 5                  | 5                                             |
| Practice Managers               | 3                  | 3                                             |
| Nurse (Clinical lead)           | 1                  | 1                                             |
| Others (eg Trust manager)       | 1                  | 1                                             |
| Local Authority Representatives | 1                  | 1                                             |
| <b>Total</b>                    | <b>91</b>          | <b>96</b>                                     |

Interviews were recorded and transcribed, and detailed contemporaneous fieldnotes were written in meetings. These data sources were analysed alongside available documents (including those produced locally and guidance issued by the Department of Health/NHSCB) using the qualitative data analysis software Atlas ti. We also examined available constitutional documents for our case study sites.

For this paper, the analysis focused upon the ways in which ideas of accountability surfaced in all of the data sources, looking to answer the following questions:

- To whom are developing CCGs formally accountable, and to whom do they regard themselves as being accountable?
- For what aspects of their performance do they expect to provide an account to each stakeholder?
- What sanctions might apply?
- What (if any) potential conflicts or problems can be identified in the new system?

## ***Results and discussion***

In the following section, the results from the study will be presented. We identified two main forms of accountability relationships of concern to the groups: accountability to external groups; and internal accountability.

### **External Accountability**

#### Relationship with the NHS Commissioning Board (later renamed 'NHS England')

The NHSCB provided a 'model constitution framework'<sup>21</sup>, which CCGs were encouraged to adapt for their own purposes. This makes it clear that CCGs are formally accountable to the NHSCB and, through the NHSCB mandate<sup>22</sup>, to the Secretary of State for Health:

5.4.1. The group will

- a) comply with all relevant regulations;
- b) comply with directions issued by the Secretary of State for Health or the NHS Commissioning Board; and
- c) take account, as appropriate, of documents issued by the NHS Commissioning Board.<sup>21</sup>

The 'regulations' referred to are pieces of secondary legislation. The potential accountabilities here are both broad and as yet undefined. In addition to general duties (such as a duty to promote integration, a duty to involve the public) first set out in earlier documents<sup>18</sup>, the model constitution sets out some specific financial duties, including: the need to maintain expenditure within agreed limits; the duty to 'take account' of directions issued by the NHSCB; and the requirement to 'publish an account' of how additional payments had been spent<sup>21</sup> para 5.3).

As well as this essentially fiscal accountability, CCGs are also accountable for outcomes, set out in the form of a new 'Clinical Commissioning Group Outcomes indicator set' (CCGOIS).

This was first mooted in the White paper, 'Equity and Excellence: Liberating the NHS':

1  
2  
3 A new NHS Outcomes Framework will provide direction for the NHS. It will  
4 include a focused set of national outcome goals determined by the Secretary of  
5 State, against which the NHS Commissioning Board will be held to account,  
6 alongside overall improvements in the NHS. In turn, the NHS Outcomes  
7 Framework will be translated into a commissioning outcomes framework for GP  
8 consortia, to create powerful incentives for effective commissioning. <sup>1</sup> p22)

9  
10  
11  
12 The indicators that have been published so far vary in scope, from those focused upon reducing  
13 mortality to those requiring the provision of particular services, such as ensuring patients with a  
14 stroke have a visit from a specialist nurse (<http://www.nice.org.uk/aboutnice/cof/cof.jsp>).

15  
16  
17  
18  
19  
20 Guidance issued in December 2012 <sup>23</sup> suggests that, in addition to a payment for meeting target  
21 thresholds on these indicators, what Leat <sup>15</sup> calls ‘programme accountability’ for these outcomes  
22 will form part of the NHSCB’s overall annual assessment of CCG performance.  
23  
24  
25

26  
27 The first hurdle for CCGs to pass was the requirement to be ‘authorised’ by the NHSCB.  
28  
29 This process involved the submission by CCGs of evidence under six ‘domains’ relating to a  
30 strong clinical and professional focus, patient and public engagement, good governance  
31 arrangements, collaboration and good leadership. Those CCGs not deemed ready for full  
32 authorisation were initially ‘authorised with conditions’. Whilst public comments by the  
33 Secretary of State for Health Andrew Lansley initially implied that such conditions would be  
34 minimal or rare <sup>24</sup>, in practice, only 43 out of 211 CCGs achieved authorisation without  
35 conditions, 158 had conditions imposed and 10 had significant conditions backed by legal  
36 directions.  
37  
38  
39  
40  
41  
42  
43  
44  
45  
46  
47

48 Once authorised, the guidance states:

49  
50  
51 **Annual assessment:** once authorised (with or without conditions), each CCG is  
52 subject to an annual assessment. This will consider how well a CCG has  
53 performed its functions in that year, and as part of that assessment, determine the  
54 nature of support or conditions going forward, based on its performance and other  
55 aspects of its organisational capabilities and relationships, and will enable the  
56 continued development of CCGs. <sup>25</sup> p11  
57  
58  
59  
60

1  
2  
3 The requirements against which this ‘assessment’ will be made have not yet been set out,  
4  
5 although it seems likely that the CCGOIS will be involved.<sup>26</sup>  
6  
7

8 It is thus clear that CCGs will be held accountable by the NHSCB, and that this will be  
9  
10 backed up by sanctions, including loss of ability to function as an autonomous statutory body,  
11  
12 and loss of income (the ‘quality premium’ will be tied to performance against the CCGOIS). The  
13  
14 accountability implied here is a managerial one, backed up by explicit performance measures.  
15  
16

17 We found that this significant formal (and sanction-backed) accountability to the NHSCB  
18  
19 was recognised in the draft constitutions under development in our case study sites, with most  
20  
21 carrying unchanged the language provided by the model documents. However, those involved  
22  
23 with setting up CCGs in our case study sites did not seem to have appreciated either the extent of  
24  
25 these obligations or their potential impact. Indeed, across 439 hours of observation and 96  
26  
27 interviews, there were only three references to ‘being held to account’ by the NHSCB.  
28  
29 Furthermore, although it was known that there would be an ‘outcomes framework’, this was also  
30  
31 rarely mentioned. It may be that this was in part a function of the timing of our data collection,  
32  
33 which took place before the NHSCB was formally constituted and before the draft CCGOIS was  
34  
35 published. However, it still seems worthy of remark that the discourse within our case study  
36  
37 CCGs showed little apparent recognition of the extent of the external accountability regime to  
38  
39 which they will be subject. When accountability to the wider NHS *was* discussed, the most  
40  
41 common type of accountability mentioned was fiscal accountability. Furthermore, in response to  
42  
43 an open-ended question in our second web-based survey (followed up in subsequent telephone  
44  
45 interviews) about their ongoing relationship with the NHSCB, by far the largest category of  
46  
47 responses were those calling for the NHSCB to give CCGs freedom, imposing few burdens such  
48  
49 as reporting requirements, targets or other forms of performance management.  
50  
51  
52  
53  
54  
55  
56  
57  
58  
59  
60



## Accountability to the public

Clause 4.5 of the model draft constitution provided by the NHSCB is headed 'Accountability'. It appears to construe this largely in the relatively weak sense of transparency, listing a series of mechanisms the CCG will use to 'demonstrate accountability':

4.5.1. The group will demonstrate its accountability to its members, local people, stakeholders and the NHS Commissioning Board in a number of ways, including by:

- a) publishing its constitution;
- b) appointing independent lay members and non GP clinicians to the group's governing body;
- c) holding meetings of the group's governing body in public (except where the group considers that it would not be in the public interest in relation to all or part of a meeting);
- d) publishing annually a commissioning plan;
- e) complying with local authority health overview and scrutiny requirements;
- f) meeting annually in public to publish and present its annual report;
- g) producing annual accounts in respect of each financial year which must be externally audited;
- h) having a published and clear complaints process;
- i) complying with the Freedom of Information Act 2000;
- j) providing information to the NHS Commissioning Board as required;
- k) publishing the group's principal commissioning and operational policies.

Most of our case study CCGs adopted this clause as it stands for their constitutions, although two sites omitted clause k.

In contrast to their relative silence about their future relationship with the NHSCB, our case study CCGs appeared keenly aware of the need to be accountable to their patients and the public. This GP expressed this clearly:

I think what we haven't done yet and what we're trying to organise now ... is go one step further and recognise that we are after all accountable to the public, we're there to serve them, we are paid by them, we're there to provide their health needs [GP ID 200]

1  
2  
3 The same GP went on to describe a pilot programme to engage local people in discussions about  
4  
5 service developments, arguing that setting up robust mechanisms would in some way protect  
6  
7 them against the centralising tendencies of the NHSCB:  
8  
9

10       ‘that will give true public accountability to the CCGs and Health and Wellbeing  
11       Boards and I think it will be very hard for agencies like the NHSCB to argue  
12       against it if the public back it. So I think that counteracts the fear of centralisation  
13       in the new reforms. [GP ID 200]  
14  
15

16  
17 Mechanisms for ensuring accountability to the public were in the early stages of development at  
18  
19 the time of our data collection. Holding meetings in public was seen as important, but there were  
20  
21 some concerns. One site had set up these meetings with the opportunity for the public to ask  
22  
23 questions only at the beginning of the meeting, rather than at the end when they might have been  
24  
25 able to respond to what they had heard. In an interview we were told:  
26  
27

28  
29       I don’t know why they’ve set it up this way to be honest. I haven’t been involved  
30       in that, so I don’t know what the rationale is. I’ve got a feeling that was how the  
31       PCT used to operate, but I might be wrong. I mean I think if we’re trying to  
32       engage with our public, but only allow them to speak at the beginning, before  
33       we’ve actually said anything...it does rather go against the ethos, I think  
34       [Manager ID 122]  
35  
36

37  
38 There was a general awareness that meeting in public alone will not ensure true public  
39  
40 accountability, and all of our study site CCGs were intending to set up additional forums for  
41  
42 patients and the public to become involved with the work of the CCG, including patient forums,  
43  
44 community involvement groups, public events and the publication of newsletters. They thus  
45  
46 showed a significant rhetorical commitment to the essentially political accountability represented  
47  
48 by so-called ‘public accountability’, but, at the time of data collection, arrangements to put this  
49  
50 in practice were rudimentary and did not yet differ significantly than those set up by their  
51  
52 predecessor organisations, PCTs  
53  
54  
55  
56  
57  
58  
59  
60

1  
2  
3 CCGs are also required to have at least two Lay members on their Governing Body<sup>27</sup>. In  
4  
5 practice, those appointed as ‘Lay’ members in our case study sites tended to be people with past  
6  
7 NHS experience, with ex-Non-executive Directors of PCTs a popular choice. PCTs were  
8  
9 required to have a majority of Non-executive directors, so that the executive directors could be  
10  
11 out-voted if necessary. This will not be the case in CCGs, suggesting that, on paper at least, the  
12  
13 ‘public’ voice within CCGs’ governing bodies will be less powerful than it has been in past NHS  
14  
15 commissioning bodies.  
16  
17  
18  
19

20 In addition to these CCG-led approaches to public accountability, the HSCA 2012  
21  
22 establishes new bodies called Local Healthwatch<sup>1</sup>. These organisations did not exist at the time  
23  
24 of our data collection, but official documents suggest that they will be expected to scrutinise  
25  
26 CCGs’ performance and hold them to account in some way, although the mechanisms by which  
27  
28 this will take place are far from clear.  
29  
30

### 31 Other external accountabilities

32  
33 CCGs also have some external accountability to other organisations. These include the  
34  
35 economic regulator, Monitor (responsible for ensuring that CCGs adhere to competition rules);  
36  
37 Health and Well-being Boards (HWB); local LA Overview and Scrutiny Committee (OSC); and  
38  
39 the Local Medical Committee (LMC). The LMC is the local representative body for GPs.  
40  
41 Members are elected from the local GP population, and historically LMCs have played a role in  
42  
43 negotiating with PCTs on behalf of GPs in their role as providers of services.  
44  
45  
46  
47

### 48 *Monitor*

49  
50 Under the HSCA 2012, Monitor is the economic regulator of the whole NHS system,  
51  
52 including promoting competition between providers of care. It is empowered to require CCGs to  
53  
54 account for their behavior with respect to procurement, and this accountability will be formally  
55  
56 backed up by the sanctions of competition law. At the same time, Monitor is required to promote  
57  
58  
59  
60

1  
2  
3 integration and co-operation between providers of health services (HSCA 2012 section 66). It  
4  
5 remains to be seen how these apparently conflicting responsibilities will play out. At the time of  
6  
7 our fieldwork, the future role of Monitor impinged little on our case study sites. This is not  
8  
9 surprising, as at this time, the details of how Monitor's future role will operate are not yet fully  
10  
11 developed at national level.  
12  
13

#### 14 15 *Accountability relationships with the Local Authority (LA)* 16

17  
18 Health and Wellbeing Boards are new LA bodies which are responsible for setting the  
19  
20 strategic direction for health and social care, leading the formal assessment of local needs. These  
21  
22 are in differing states of development across the country, and at the time of data collection it was  
23  
24 unclear how the mutual 'holding to account' between HWBs and CCGs would operate in future.  
25  
26 HWBs are responsible for developing the annual Joint Strategic Needs Assessment (JSNA), and  
27  
28 CCGs are required to 'take account' of this in developing their own strategic plans. CCGs have  
29  
30 representatives on their local HWB, and will therefore be party to the JSNA development.  
31  
32 Should the HWB consider that the CCGs plans do not fit within it, they will be able to ask the  
33  
34 CCG to 'provide an account' to explain why this is the case. However, no sanctions exist should  
35  
36 the CCG continue to disregard the HWB. Whilst it remains early days, our study found evidence  
37  
38 of two approaches to this developing relationship<sup>28</sup>. In some sites, the CCGs appeared to see  
39  
40 themselves as an integral and important part of the development of the HWB, seeing themselves  
41  
42 as 'co-owners' of the HWB with the Local Authority. In other areas, we saw HWBs developing  
43  
44 separately, with the CCG representatives present at meetings but apparently seeing themselves as  
45  
46 representing the CCG rather than as partners in the HWB process. It remains to be seen how  
47  
48 these differing approaches develop over time, and how HWBs will react should CCGs decide to  
49  
50 disregard their concerns.  
51  
52  
53  
54  
55  
56  
57  
58  
59  
60

1  
2  
3 The other key LA accountability mechanism is via the Overview and Scrutiny (O&S)  
4 process. Historically, O&S Committees (OSCs) were empowered to examine any ‘significant’  
5 changes to local services, requiring relevant NHS senior managers to attend and explain their  
6 plans. Should the committee be unconvinced, they had the power to refer the proposed change to  
7 the Secretary of State for Health. It was initially proposed that this scrutiny function would be  
8 assumed by HWBs, but after some debate, it was decided that LAs should retain it as a separate  
9 function<sup>29</sup>. However, considerable uncertainties remain as to how this will function in practice  
10  
11  
12  
13  
14  
15  
16  
17  
18  
19  
20  
21  
22  
23  
24  
25  
26  
27  
28  
29  
30  
31  
32  
33  
34  
35  
36  
37  
38  
39  
40  
41  
42  
43  
44  
45  
46  
47  
48  
49  
50  
51  
52  
53  
54  
55  
56  
57  
58  
59  
60

<sup>19</sup>. Given the early stages of development of the new structures, it is not surprising that the majority of respondents in our case study sites were as yet little concerned with their obligations to account for themselves before the local OSC. This manager expressed some skepticism:

To be honest with you, I didn’t really understand why we were held to account by the OSC because... especially if they don’t understand the area of work that we’re talking about. If you go in and talk about diagnostics and how we’re going to reconfigure that in the health economy, really, they wouldn’t really know what... so I think it’s... I think it’s useful for some things, the joint initiatives like... like the stability, transport and all those sort of things that kind of have a cross-cutting effect, but I’m not really sure that it’s useful for the specific health issues.  
[manager ID 152]

Others were more positive, describing the O&S process as ‘helpful’ in the past in refining and developing plans.

#### *Local Medical Committees*

Finally, many of our CCGs were keen to include their Local Medical Committee in discussions of their development plans. LMCs have no formal role in CCG development, but those we studied were aware that to antagonise the LMC could carry significant consequences in terms of member engagement. Many utilised the LMC to organise the elections to their board, and continued to liaise and consult with the group. In one site we witnessed a long discussion about the future relationship between the CCG and the local LMC. The LMC had requested

1  
2  
3 regular formal meetings with the CCG Governing Body, but the CCG resisted this, agreeing that  
4  
5 they should engage, but suggesting that frequent meetings would be unnecessarily burdensome.  
6  
7  
8 The CCG lay member commented: 'now you [as GPs] are directly responsible, you are the  
9  
10 accountable body and the LMC have no role to hold you to account'. Another group included  
11  
12 this clause in their constitution:  
13

14  
15 The LMC  
16 3.6.1 The CCG recognises [local] Local Medical Committee as the statutory  
17 representative body of general practice for provider purposes in relation to local  
18 primary care contracts. There will also be full observer status for the LMC on the  
19 CCG Governing Body and the Chair of the CCG will regularly attend meetings of  
20 the LMC by invitation to provide updates, briefings and respond to individual  
21 areas of concern. Other opportunities for engagement (such as Locality Link  
22 Members) will be set out in the member practice engagement strategy. The LMC  
23 also plays an important role in independently running the election process for  
24 Locality GP representation.'  
25  
26  
27  
28

### 29 *Overlapping accountabilities*

30  
31 It is thus clear that CCGs are subject to a wide range of external accountabilities. The most  
32  
33 clearly developed of these is the accountability to the NHS England, but it is also clear that a  
34  
35 wide range of other bodies feel that they have a role. The extent of these external accountabilities  
36  
37 was experienced as problematic at times, with one manager commenting:  
38  
39

40  
41 ...there's people in the rest of the NHS are trying to work out what their roles are.  
42 You know, I have had four demands this week from different places for a slightly  
43 different perspective report on the same topic, and not just a report but then turn  
44 up and tell them and assure them you're doing something about it. And that's just  
45 on the one topic. That's the world we're living in. And while you're satisfying that  
46 world, it's very difficult to focus on what your organisation should be doing.  
47  
48 [manger ID 173]  
49  
50

### 51 **Internal accountability**

52  
53 CCGs are membership organisations, and this is said to be one of the key strengths of the  
54  
55 new structures<sup>30</sup>. As such, there is a two-way accountability relationship between the CCG  
56  
57  
58  
59  
60

1  
2  
3 Governing Body and the practices who are members, as well as accountabilities between the  
4  
5 various working groups within the CCG.  
6  
7

#### 8 Members' accountability to the CCG 9

10 The CCGs in our study were clear that their practice members would be in an  
11  
12 accountability relationship with the CCG, and this relationship was one in which the CCG would  
13  
14 'hold practices to account' for their behaviour, including such things as referral practices and  
15  
16 prescribing. This manager described it thus:  
17  
18

19  
20 Q: What would you claim to be the early success of a CCG? I mean you, how  
21 would you see it?

22 A: That's a very good question [laughter]. I think... one of things it has done is it  
23 has got more GPs involved and more GPs talking to one another and looking at  
24 their referral patterns and realising that ... they are accountable rather than it  
25 maybe just being one person for a practice being the person who goes to this  
26 meeting, comes back and everybody goes oh, well that's fine and just ignores it. I  
27 think there is certainly an additional...almost accountability, a buy in from more  
28 GPs across the patch. [Manager ID 254]  
29  
30  
31  
32

33 In many sites the relationship between practices and the wider group is governed by a written  
34  
35 agreement, called an 'accountability' or 'membership' agreement:  
36  
37

38 If you're working as a CCG and you've... signed up to your accountability  
39 agreement and everyone's in it together, you can't have some practices  
40 overspending ridiculously and some desperately trying to make savings. You  
41 know, that's not... I don't think that's on. [GP ID 37]  
42  
43  
44

45 These agreements were usually developed in addition to the CCG constitution, and set out  
46  
47 mutual obligations within the group. Thus, for example, in Site 3 the 'membership agreement'  
48  
49 forms an appendix to the formal constitution of the group. It sets out what the CCG will provide  
50  
51 for practices (such as the provision of timely information, educational events and prescribing  
52  
53 support) and stipulates the following practice obligations:  
54  
55

- 56 • To share named information by practice for peer review  
57  
58  
59  
60



- To actively participate in demand management using specified tools
- To actively communicate with other members, the locality and the CCG as a whole
- To develop a framework for quality within the practice
- To agree and sign up to the terms of the Constitution.
- If any member practice fails to meet agreed targets, they agree to work on and implement a development plan.
- To provide a practice patient representative for the patient and public engagement body
- To name a practice lead for Clinical Commissioning
- To work on and implement care closer to home pathways
- To actively manage the devolved budget to assist financial balance and QIPP
- To support robust and effective clinical, financial and operational risk management across the CCG [Extract from Membership agreement Site 3]

Such agreements suggest a degree of voluntarism, by which practices are ceding some sovereignty to the wider group, in return for receiving support and access to the resources of the group. However, CCG membership is compulsory for all practices in England, so this voluntarism is in practice somewhat illusory:

A membership agreement had been drawn up (see associated documents). This has to be signed by all GPs. [GP lead] asked how best to go about this. He also pointed out that this agreement is not a legally binding document. After some discussion it was agreed to send out the document to practice managers and ask them to oversee the process and [manager] was asked to follow up those that did not return the signed agreement. [participant] asked if they should plan for those who refuse to sign. [GP lead] said: there is no choice! [Extract from fieldnotes, Locality meeting ID M54]

It also remains unclear what sanctions might apply, should practices break the terms of these agreements. One CCG constitution suggests that practices failing to keep to the agreement would have to 'give an account' firstly to their local peers, and subsequently to the CCG board, but no



1  
2  
3 sanctions and timescales are specified. Such agreements must walk a fine line, as performance  
4  
5 management of GPs with respect to their clinical practice will be the responsibility of NHSE, and  
6  
7 there has been national concern to ensure that CCGs do not stray into this aspect of practice<sup>31</sup>.  
8  
9

### 10 Accountability to members

11  
12 The formal accountability of the CCG to its constituent members is mainly promulgated  
13  
14 through the accountability of its governing body to the members; and of the specific officers of  
15  
16 the CCG (being the Chair, Accountable Officer (AO) and Chief Financial Officer (CFO)) to the  
17  
18 CCG. One aspect of accountability is the ability to dismiss those who do not perform well. The  
19  
20 general principle for CCGs is that members elect their governing body and chair for time limited  
21  
22 terms. But the model constitution does not specify exactly how the governing body, officers and  
23  
24 committees should be elected and dismissed, and there is some variation in how this has been  
25  
26 arranged in the constitutions adopted in the study sites. The governing body is accountable to the  
27  
28 members for the running of the CCG in accordance with its constitution. Clause 7.3.1. of the  
29  
30 model constitution explains how  
31  
32  
33  
34

35  
36 ‘each member of the governing body should share responsibility as part of a team  
37  
38 to ensure that the group exercises its functions effectively, efficiently and  
39  
40 economically, with good governance and in accordance with the terms of this  
41  
42 constitution’

43  
44 The officers of the CCG are also accountable to the governing body of the CCG, and through  
45  
46 that to the CCG membership. Each CCG’s draft constitution sets out its own requirements for  
47  
48 appointment and removal. For example, the chair in one site must be a ‘provider of primary  
49  
50 medical services’ who is elected by ‘qualifying providers of primary medical services’. There is  
51  
52 a two to four year term, renewable to a maximum of ten years. Some of the constitutions state  
53  
54 circumstances in which the chair would be obliged to stand down, for example in another site, if  
55  
56 the chair  
57  
58  
59  
60

1  
2  
3  
4  
5  
6  
7  
8  
9  
10  
11  
12  
13  
14  
15  
16  
17  
18  
19  
20  
21  
22  
23  
24  
25  
26  
27  
28  
29  
30  
31  
32  
33  
34  
35  
36  
37  
38  
39  
40  
41  
42  
43  
44  
45  
46  
47  
48  
49  
50  
51  
52  
53  
54  
55  
56  
57  
58  
59  
60

‘has behaved in a manner or exhibited conduct which has or is likely to be detrimental to the reputation and interest of the group and is likely to bring the group into disrepute. This includes but is not limited to dishonesty, misrepresentation (either knowingly or fraudulently), defamation of any member of the governing body, abuse of position, non declaration of a known conflict of interest, seeking to lead or manipulate a decision of the governing body in a manner that would ultimately be in favour of that person whether financially or otherwise;’

As might be expected as CCGs were in the process of establishing themselves, we witnessed considerable discussion about these internal governance issues within the groups. In meetings and in interviews comments were made about the following accountabilities:

- The CCG Governing Body is accountable to the members
- Locality groups are accountable to the Governing Body
- Sub-committees are accountable to the Governing Body
- Employed officers are accountable to the Governing Body
- Elected Governing Body members are accountable to the membership

However, such discussions rarely included any mention of either the mechanisms by which such accountabilities would be promulgated, or the sanctions that might apply. In practice, our findings suggest that the main mechanism by which these accountabilities will be enforced is by information sharing and transparency, with Governing Bodies receiving reports from sub groups and Localities, and in turn reporting on their activities to assemblies of members. This would seem to be a form of *political* accountability, with the respective groups making an argument and providing justifications for their actions, with no explicit performance measures and few available sanctions. The only area in which there would seem to be some possible formal sanctions is in the election/selection of officers such as Chair and AO, as discussed above. It is also conceivable that a CCG Governing Body which had lost the confidence of its membership

1  
2  
3 might find that practices informally withdrew their co-operation; whether the Governing Body  
4  
5 could use its authority to prevent this is unclear.  
6  
7

## 8 *Summary*

10 Our study shows that CCGs are subject to a complex web of accountability relationships.  
11  
12 The strongest form of accountability would seem to be their accountability to NHS England  
13  
14 (NHSCB), backed by sanctions and subject to annual assessment. Furthermore, the currency of  
15  
16 this accountability is clearly established, encompassing fiscal accountability and programme  
17  
18 accountability for the COGIS. The accountability to other external bodies such as HWB is, by  
19  
20 contrast, much weaker, and less clearly defined, with CCGs required to ‘give an account’, with  
21  
22 no associated sanctions. Accountability to Monitor may be more formal, as it would seem that  
23  
24 Monitor will be empowered to enforce competition law, although how this will operate in  
25  
26 practice is as yet unclear. Accountability to the public is a political accountability, focused upon  
27  
28 the relatively weak notion of ‘transparency’, with no associated sanctions. Internal accountability  
29  
30 is similarly complex, with a mix of mutual and one way relationships, some accompanied by the  
31  
32 ultimate sanction of voting out office holders. Practices are said to be ‘held to account’ if they  
33  
34 transgress the rules of the group, but it is unclear as yet if they could be ejected, as all practices  
35  
36 must be a member of a CCG. These external accountabilities can be summarised in  
37  
38 diagrammatic form:  
39  
40  
41  
42  
43  
44

46 Figure 2: CCG external accountabilities

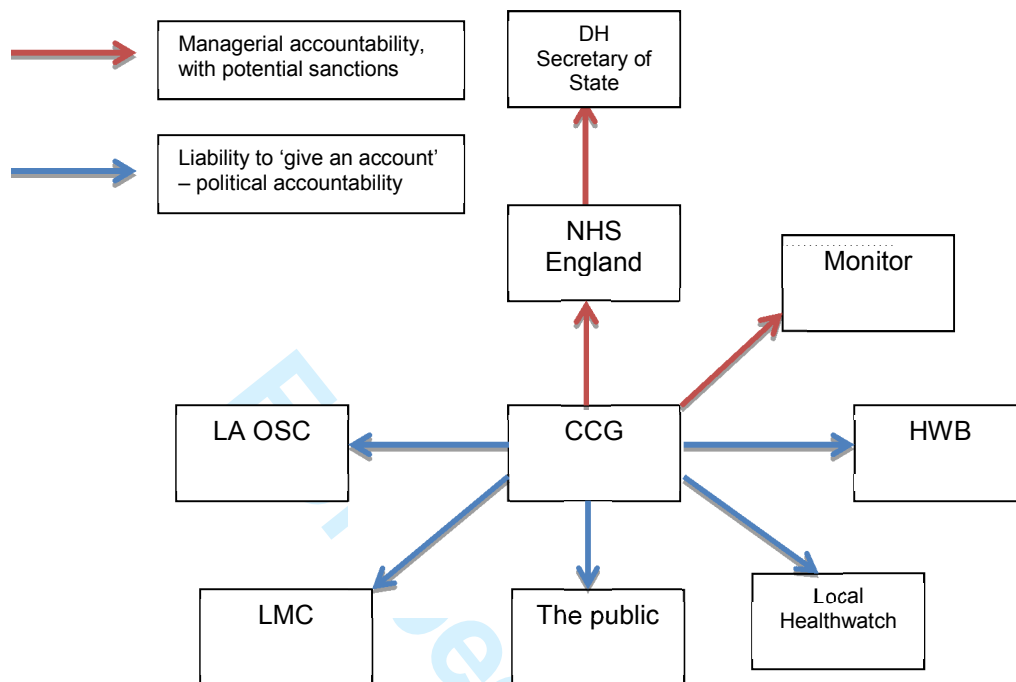

Internal accountability relationships are similarly complex. Figure 3 summarises these, distinguishing between those bodies within CCGs which will hold each other to account, and those which are accountable:

Figure 3: CCG internal accountabilities

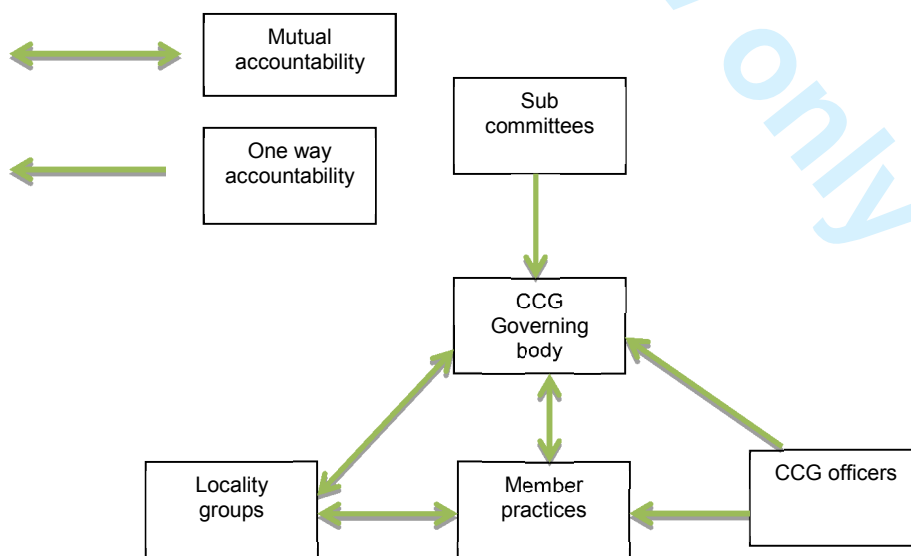

## *Discussion*

### **Principal findings and their implications**

The Health and Social Care Act 2012 promised ‘increased accountability’ as justification for the wide ranging NHS reforms in England. Our study suggests that CCGs will indeed be ‘more accountable’ than their predecessor organisations (Primary Care Trusts) in the sense that they will be accountable to a much wider range of organisations and bodies of people. Indeed, we have shown that CCGs are at the centre of a complex web of accountability relationships, both internal and external. However, whether this translates into being more responsive, or more easily held to account, remains to be seen.

In general, studies suggest that complex accountability arrangements tend to generate confusion<sup>32</sup>, and that, where organisations are accountable to multiple audiences, the interests of those audiences may differ, generating unintended consequences<sup>33</sup>. This may be important for CCGs, as they attempt to balance the demands of the multiple audiences to whom they are being asked to account. We have shown that, as things stand, the accountability relationship with NHS England is the only one in which the currency and focus of accountability is clearly set out, although even this managerial accountability remains untested. However, our study participants also showed a keen commitment to other, more political forms of accountability, and it is possible that in future, CCGs will choose to satisfy their public audiences rather than NHS England or the Department of Health. Thus, for example, NHS England has suggested that CCGs’ closeness to their members and their responsibility to account to local politicians via HWBs will make it easier to make difficult decisions about service reconfigurations<sup>34</sup> but it is equally likely that CCGs accountable to local politicians and to local people via daily contacts in their surgeries will avoid such hard decisions in the face of public opposition.

### Strengths and weaknesses

This study took place during the early phases of CCG establishment, and therefore provides a snap shot of a developing situation. However, the data collected were wide and deep, and the findings therefore provide a robust picture of the developing landscape of CCG accountability.

### Comparison with previous studies

It is instructive to compare CCGs with their predecessor organisations, Primary Care Trusts (PCTs). PCTs were straightforwardly accountable (via a managerial accountability regime, backed by the sanction that senior individuals could lose their jobs) to their local Strategic Health Authority, who were, in turn, accountable to the Secretary of State. In addition, they had a duty to account to patients and the public, consulting them and providing information about their decisions. In practice, the strong accountability backed by personal sanctions for the senior executives drove the agenda, with studies highlighting the clear distinction between ‘must do’ actions where one’s job could be at risk, versus those which could be negotiated or modified<sup>35</sup>. The potential distorting effect of this type of strong accountability has been well documented<sup>36</sup>. Senior staff in CCGs do not appear at present to be subject to personal sanctions in quite such an immediate way, and it will be interesting to explore over the coming months whether the threat of organisational sanctions will act to drive the agenda in a similar way.

It is too early for there to be any published empirical study of CCG accountability, although some commentaries have been published. In the most comprehensive of these, writing from a legal perspective, Davies<sup>37</sup> argues that the complex additional accountabilities to which CCGs are subject may, in practice, act to dilute the important central accountability to Parliament that the Act is ostensibly designed to promote.

### Unanswered questions

1  
2  
3 CCGs are responsible for significant amounts of public money, and it is important that they are  
4 subject to scrutiny as they develop their new ways of working. This study provides an early look  
5  
6 their developing accountability relationships, and highlights the complexity and potential  
7  
8 problems which may arise. It is vital that further work follows these finding up and explores in  
9  
10 depth the way in which the complex relationships identified here play out in practice over time.  
11  
12  
13 Ultimately, the extent to which CCGs are felt to be truly accountable for their work will be an  
14  
15 important aspect of any overall judgment about the success of this significant reform programme.  
16  
17  
18  
19

### 20 **References**

- 21 1. Department of Health. *Equity and Excellence: liberating the NHS*. London: The Stationary  
22 Office, 2010.
- 23 2. Cabinet Office. *The Coalition: our programme for government. Freedom, fairness,*  
24 *responsibility*. London: Cabinet Office, 2010.
- 25 3. Flynn R, Williams G, editors. *Contracting for health: quasi-markets and the NHS*. Oxford:  
26 Oxford university Press, 1997.
- 27 4. Health and Social Care Act. Department of Health, 2012.
- 28 5. NHS Commissioning Board. *Developing commissioning support: Towards service excellence,*  
29 *2012*.
- 30 6. Department of Health. *A short guide to NHS Foundation Trusts*. London: The Stationary  
31 Office, 2005.
- 32 7. NHS Commissioning Board. *Towards establishment: Creating responsive and accountable*  
33 *Clinical Commissioning Groups 2012*.
- 34 8. Mulgan R. 'Accountability': an ever-expanding concept? *Public Administration*  
35 *2000;78(3):555*.
- 36 9. Ryan C, Walsh P. Collaboration of public sector agencies: reporting and accountability  
37 challenges. *International Journal of Public Sector Management* 2004;17(7):621-31.
- 38 10. Hood C. A public management for all seasons? *Public Administration* 1991;69(1):3-19.
- 39 11. Bovens M. Analysing and Assessing Accountability: A Conceptual Framework1. *European*  
40 *Law Journal* 2007;13(4):447-68.
- 41 12. Brinkerhoff DW. Accountability and health systems: toward conceptual clarity and policy  
42 relevance. *Health Policy and Planning* 2004;19(6):371-79.
- 43 13. Friedman A. Beyond accountability for reasonableness. *Bioethics* 2008;22(2):101-12.
- 44 14. Yamin AE. Beyond Compassion: The Central Role of Accountability in Applying a Human  
45 Rights Framework to Health. *Health and Human Rights* 2008;10(2).
- 46 15. Leat D. *Voluntary organisations and accountability*. London: Policy Analysis Unit, National  
47 Council For Voluntary Organisations, 1988.
- 48 16. Day P, Klein R. *Accountabilities: five public services*. London and New York: Tavistock,  
49 1987.
- 50  
51  
52  
53  
54  
55  
56  
57  
58  
59  
60



17. Miller R, Peckham S, Checkland K, Coleman A, McDermott I, Harrison S, et al. Clinical engagement in primary care-led commissioning: a review of the evidence. London: Policy Research Unit in Commissioning and the Healthcare System (PRUComm), 2012.
18. Department of Health. The Functions of GP Commissioning Consortia. A Working Document. *Gateway ref 15472*, 2011.
19. Coleman A, Harrison S. What next for health scrutiny? *Journal of Integrated Care* 2013;21(2):54-63.
20. Checkland K, Coleman A, Segar J, McDermott I, Miller R, Wallace A, et al. Exploring the early workings of emerging Clinical Commissioning Groups: Final report. . London: Policy Research Unit in Commissioning and the Healthcare System (PRUComm), , 2012.
21. NHS Commissioning Board. Model CCG Constitution Framework, 2012.
22. Department of Health. The Mandate: a mandate from the Government to the NHS Commissioning Board. London: The Stationary Office, 2012.
23. NHS Commissioning Board. Quality Premium: 2013/14 guidance for CCGs. Draft, 2012.
24. McLellan A. Lansley expects 'nearly all' CCGs to be authorised by deadline. *Health Service Journal* 2012;14th June 2012.
25. Department of Health. Developing Clinical Commissioning Groups: towards authorisation. London: The Stationary Office, Gateway Reference 16367, 2011.
26. Kaffash J. Revealed: CCG targets for quality premium. *Pulse* 2012;18th Dec 2012.
27. NHS Commissioning Board. Clinical commissioning group governing body members: role outlines, attributes and skills. *October 2012*, 2012.
28. Coleman A, Checkland K, Segar J, McDermott I, Harrison S, Peckham S. Joining it up? Health and Wellbeing in the new English National Health Service organisation: Early evidence from Clinical Commissioning Groups and shadow Health and Wellbeing Boards. *Local Government Studies* In press.
29. Department of Health. Government response to the NHS Future Forum report *CM8113*, 2011.
30. NHS Commissioning Board. Clinical Commissioning Groups HR Guide. *May 2012*, 2012.
31. Iacobucci G. CCGs ramp up performance management of GPs as thousands sign inter-practice agreements. *Pulse* 2012;23rd June 2012.
32. Dixon A, Storey J, Alvarez Rosete A. Accountability of Foundation Trusts in the English NHS: Views of Directors and Governors. *Journal of Health Services Research & Policy* 2010;15(2):82-89.
33. Davies A. Tangled Web - Accountability and the Commissioning Role in the New NHS. *King's College Law Journal* 2007;18(3):393.
34. NHS Commissioning Board. Clinical commissioning group authorisation: Draft guide for applicants. *April 2012*, 2012.
35. Macfarlane F, Exworthy M, Wilmott M, Greenhalgh T. Plus ça change, plus c'est la même chose: senior NHS managers' narratives of restructuring. *Sociology of Health & Illness* 2011;33(6):914-29.
36. Bevan G, Hamblin R. Hitting and missing targets by ambulance services for emergency calls: effects of different systems of performance measurement within the UK. *Journal of the Royal Statistical Society* 2009;172(1):161(30).
37. Davies ACL. This Time, it's for Real: The Health and Social Care Act 2012. *The Modern Law Review* 2013;76(3):564-88.





**Accountable to whom, for what? An exploration of the early development of Clinical Commissioning Groups in the English NHS**

|                                 |                                                                                                                                                                                                                                                                                                                                                                                                                                                                                                                                                                                                        |
|---------------------------------|--------------------------------------------------------------------------------------------------------------------------------------------------------------------------------------------------------------------------------------------------------------------------------------------------------------------------------------------------------------------------------------------------------------------------------------------------------------------------------------------------------------------------------------------------------------------------------------------------------|
| Journal:                        | <i>BMJ Open</i>                                                                                                                                                                                                                                                                                                                                                                                                                                                                                                                                                                                        |
| Manuscript ID:                  | bmjopen-2013-003769.R1                                                                                                                                                                                                                                                                                                                                                                                                                                                                                                                                                                                 |
| Article Type:                   | Research                                                                                                                                                                                                                                                                                                                                                                                                                                                                                                                                                                                               |
| Date Submitted by the Author:   | 01-Nov-2013                                                                                                                                                                                                                                                                                                                                                                                                                                                                                                                                                                                            |
| Complete List of Authors:       | Checkland, Kath; University of Manchester, Centre for Primary Care<br>Allen, Pauline; LSHTM, Health Services Research Unit<br>Coleman, Anna; University of Manchester, Centre for Primary Care<br>Segar, Julia; University of Manchester, Centre for Primary Care<br>McDermott, Imelda; University of Manchester, Centre for Primary Care<br>Harrison, Stephen; University of Manchester, National Primary Care Research and Developmen; University of Manchester, Centre for Primary Care<br>Petsoulas, Christina; LSHTM, Health Services Research Unit<br>Peckham, Stephen; University of Kent, CHSS |
| <b>Primary Subject Heading</b>: | Health services research                                                                                                                                                                                                                                                                                                                                                                                                                                                                                                                                                                               |
| Secondary Subject Heading:      | Health policy, Qualitative research                                                                                                                                                                                                                                                                                                                                                                                                                                                                                                                                                                    |
| Keywords:                       | Health policy < HEALTH SERVICES ADMINISTRATION & MANAGEMENT, Organisation of health services < HEALTH SERVICES ADMINISTRATION & MANAGEMENT, Accountability, case study research, Clinical Commissioning Groups                                                                                                                                                                                                                                                                                                                                                                                         |
|                                 |                                                                                                                                                                                                                                                                                                                                                                                                                                                                                                                                                                                                        |

1  
2  
3  
4 **Accountable to whom, for what? An exploration of the early development of**  
5  
6  
7 **Clinical Commissioning Groups in the English NHS**  
8

9 **Kath Checkland, Pauline Allen, Anna Coleman, Julia Segar, Imelda McDermott, Stephen**  
10 **Harrison, Christina Petsoulas, Stephen Peckham.**  
11

12  
13 Dr Kath Checkland, Reader in Primary Care, Centre for Primary Care, University of Manchester,  
14 5<sup>th</sup> Floor, Williamson Building, University of Manchester Oxford Road, Manchester M13 9PL

15 Dr Pauline Allen, Reader in Health Policy, Department of Health Service Research and Policy,  
16 London School of Hygiene and Tropical Medicine, 15-17 Tavistock Place, London WC1H 9SH

17 Dr Anna Coleman, Research Fellow, Centre for Primary Care, University of Manchester, 5<sup>th</sup>  
18 Floor, Williamson Building, University of Manchester, Oxford Road, Manchester M13 9PL

19 Dr Julia Segar, Research Associate, Centre for Primary Care, University of Manchester, 5<sup>th</sup>  
20 Floor, Williamson Building, University of Manchester Oxford Road, Manchester M13 9PL

21 Dr Imelda McDermott, Research Associate, Centre for Primary Care, University of Manchester,  
22 5<sup>th</sup> Floor, Williamson Building, University of Manchester Oxford Road, Manchester M13 9PL

23 Prof Stephen Harrison, Professor of Social Policy, Centre for Primary Care, University of  
24 Manchester, 5<sup>th</sup> Floor, Williamson Building, University of Manchester Oxford Road, Manchester  
25 M13 9PL

26 Dr Christina Petsoulas, Research Fellow, Department of Health Service Research and Policy,  
27 London School of Hygiene and Tropical Medicine, 15-17 Tavistock Place, London WC1H 9SH

28 Prof Stephen Peckham, Professor of Health Policy, Centre for Health Services Studies,  
29 University of Kent, The Registry, Canterbury, Kent, CT2 7NZ  
30  
31

32  
33  
34 **Address for correspondence:**

35 **Dr Kath Checkland** Reader in Primary Care

36 Centre for Primary Care

37 Institute of Population Health

38 5<sup>th</sup> Floor, Williamson Building

39 University of Manchester

40 Oxford Road

41 Manchester M13 9PL

42 [Katherine.checkland@manchester.ac.uk](mailto:Katherine.checkland@manchester.ac.uk)  
43  
44  
45  
46  
47  
48  
49  
50  
51  
52  
53  
54  
55  
56  
57  
58  
59  
60

# Accountable to whom, for what? An exploration of the early development of Clinical Commissioning Groups in the English NHS

## *Abstract*

*Objective:* One of the key goals of the current reforms in the English NHS under the Health and Social Care Act, 2012, is to increase the accountability of those responsible for commissioning care for patients (Clinical Commissioning Groups (CCGs)), whilst at the same time allowing them greater autonomy. This study set out to explore CCG's developing accountability relationships.

*Design:* We carried out detailed case studies in eight CCGs, using interviews, observation and documentary analysis to explore their multiple accountabilities.

*Setting/participants:* We interviewed GPs, managers and Governing Body members in developing CCGs, and observed a wide variety of meetings.

*Results:* CCGs are subject to a managerial, sanction-backed accountability to NHS England (the highest tier in the new organisational hierarchy), alongside a number of other external accountabilities to the public and to some of the other new organisations created by the reforms. In addition, unlike their predecessor commissioning organisations, they are subject to complex internal accountabilities to their members.

*Conclusions:* The accountability regime to which CCGs are subject is considerably more complex than that which applied their predecessor organisations. It remains to be seen whether the twin aspirations of increased autonomy and increased accountability can be realised in practice. However, this early study raises some important issues and concerns, including the risk that the different bodies to whom CCGs are accountable will have differing (or conflicting) agendas, and the lack of clarity over the operation of sanction regimes.

## Summary

### Article focus

It is claimed by the architects of the current reorganisation of the English NHS that the changes will increase accountability across the service. This article explores how this is playing out in practice, focusing upon the accountabilities to which newly formed Clinical Commissioning Groups (CCGs) are subject.

### Key messages

- The accountability arrangements for CCGs are considerably more complex than those experienced by their predecessor organisations, with multiple external accountabilities as well as internal accountability to members.
- There is potential for conflict between the different accountabilities, and it is unclear how far the aspiration for 'greater accountability' can be met
- This study is important, as it provides the first evidence about how CCGs are beginning to tackle their complex and developing role. It raises questions which future research must address.

### Strengths and limitations

This study took place during the early phases of CCG establishment, and therefore provides a snap shot of a developing situation. However, the data collected were wide and deep, and the findings therefore provide a robust picture of the developing landscape of CCG accountability.

### Data sharing

There is no additional data available.

## Introduction

‘The Government’s reforms will liberate professionals and providers from top-down control. This is the only way to secure the quality, innovation and productivity needed to improve outcomes. We will give responsibility for commissioning and budgets to groups of GP practices; and providers will be freed from government control to shape their services around the needs and choices of patients. Greater autonomy will be matched by increased accountability to patients and democratic legitimacy, with a transparent regime of economic regulation and quality inspection to hold providers to account for the results they deliver.’<sup>1</sup>

Having initially promised ‘no more top-down reorganisations of the NHS’<sup>2</sup>, the UK Coalition Government elected in 2010 immediately embarked on a radical overhaul of the NHS in England (the NHSs in Wales, Scotland and Northern Ireland are governed by the devolved authorities), with a reorganisation that affects most parts of the service. As this quote suggests, the driving force behind the reforms was a desire to ‘liberate’ professionals from top-down control, at the same time as making them more accountable. In brief, the changes maintain and extend the notion of a ‘quasi-market’ in the NHS, first introduced in the 1990s<sup>3</sup>. Overall responsibility for running the NHS has been removed from the Department of Health (DH) and handed to a new arm’s length body, NHS England<sup>1</sup>. Responsibility for commissioning (purchasing) the majority of services for a defined geographical population was historically held by Primary Care Trusts (PCTs). These organisations were managerially dominated, and were directly accountable to the Department of Health (ie the Health Ministry). The Health and Social Care Act<sup>4</sup> abolished PCTs (from 1/4/13), passing responsibility for commissioning to primary care physicians (General Practitioners, GPs) working together in local Clinical Commissioning Groups (CCGs). These groups were established as statutory bodies from 1/4/13, and are now responsible for 65% of the overall budget of the NHS, covering a defined geographical area and commissioning routine and emergency care. NHS England (NHSE) will oversee CCGs, and will

<sup>1</sup> This body was initially called ‘the NHS Commissioning Board’ (NHSCB), but just prior to its formal establishment this was changed to NHS England. .

1  
2  
3 be responsible for commissioning some services (eg primary care, specialised services) at a  
4 national level. Managerial budgets for CCGs will be significantly less than was the case for  
5  
6 PCTs, and they will be expected to 'buy in' managerial commissioning support from standalone  
7  
8 organisations, known as 'Commissioning Support Units' (CSUs)<sup>5</sup>. Further regulation will be  
9  
10 provided by Monitor, which is an arm's length government body originally established to  
11  
12 regulate quasi-independent NHS hospitals known as 'Foundation Trusts'<sup>6</sup>. Monitor now has an  
13  
14 expanded role as economic regulator of the new NHS system, responsible for the prevention of  
15  
16 anti-competitive behaviour, the promotion of integration, setting prices within the system and  
17  
18 ensuring service continuity. Responsibility for Public Health is transferred to Local Government  
19  
20 Authorities (LAs), and new LA sub-committees known as Health and Well-being Boards (HWB)  
21  
22 have been created, charged with setting the over-arching strategic direction for health and social  
23  
24 care services across a geographical area. CCGs will be members of these bodies, and will be  
25  
26 expected to set their own priorities in response to the strategic direction set by their local HWB.  
27  
28  
29  
30  
31  
32  
33

34 Thus, the new system creates a number of new bodies with significant responsibilities,  
35  
36 and redefines relationships in significant ways, with an associated increase in complexity. This  
37  
38 increase in complexity in part has come about because of the continued commitment by the UK  
39  
40 government to the idea of a market in healthcare, a commitment shared by other governments  
41  
42 across the world. However, markets require regulation, and recent scandals in England have  
43  
44 demonstrated just how difficult that regulation can be. One of the official aspirations  
45  
46 underpinning the creation of CCGs in England (as demonstrated by the quotation opening this  
47  
48 article) is to enable greater accountability, and it is clear from the brief description given above  
49  
50 that the success of the new system will, to some extent, depend upon how successfully the new  
51  
52 accountability relationships are established. However, in spite of very extensive documentation  
53  
54 issued to guide CCGs as they established themselves (see  
55  
56  
57  
58  
59  
60

1  
2  
3 <http://www.england.nhs.uk/resources/resources-for-ccgs/>, accessed June 2013) the exact nature  
4  
5 of CCG accountability relationships remains ill-defined and somewhat unspecified. One of the  
6  
7 key guidance documents issued to CCGs was a guide to governance processes (NHS  
8  
9 Commissioning Board 2012f). Accountability is referred to thus:

10  
11  
12  
13 CCGs will have to **account to the patients and population** they serve as well as  
14 **being accountable to the NHS Commissioning Board (NHS England)**. This  
15 will require a comprehensive and effective patient and public engagement strategy  
16 with systems and processes to assure the governing body that this is taking place  
17 throughout the organisation. They will need to play a full role on their local  
18 Health and Wellbeing Boards including co-operating, in preparing joint strategic  
19 needs assessments, and agreeing a joint Health and Wellbeing Strategy. They will  
20 also **work in partnership with Local Authorities** and (as members of the Health  
21 and Wellbeing Boards) have a role in encouraging **health and social care**  
22 **commissioners** with the aim of securing better integrated health and social care  
23 for their patients. They will have a responsibility to ensure that **relevant health**  
24 **and care professionals** are involved in the design of services and **that patients**  
25 **and the public** are actively involved in the commissioning arrangements<sup>7</sup> p4  
26  
27 (emphasis added).  
28  
29  
30

31  
32 This paragraph indicates potential complexities facing CCGs, referring to a number of different  
33 audiences and stakeholders. However, it is silent about the mechanics of the various  
34 accountability relationships, and provides no advice as to how any conflicts between them might  
35 be resolved.  
36  
37  
38  
39

40  
41 This paper uses evidence from a study of the early development of CCGs to explore how  
42 claims to increased accountability might play out in practice. We examine CCG constitutional  
43 documents, interviews with CCG leaders and observation of CCG meetings to explore how  
44 CCGs are interpreting their accountabilities and how the new system is developing in practice.  
45  
46 Although it is early days, and the full effect of the various accountability relationships will not  
47 become clear for some time, we believe that it is valuable to highlight developing complexities  
48 and potential issues at this point.  
49  
50  
51  
52  
53  
54  
55  
56  
57  
58  
59  
60

1  
2  
3  
4  
5  
6  
7  
8  
9  
10  
11  
12  
13  
14  
15  
16  
17  
18  
19  
20  
21  
22  
23  
24  
25  
26  
27  
28  
29  
30  
31  
32  
33  
34  
35  
36  
37  
38  
39  
40  
41  
42  
43  
44  
45  
46  
47  
48  
49  
50  
51  
52  
53  
54  
55  
56  
57  
58  
59  
60

What follows is divided into five sections. A short discussion of the relevant dimensions of ‘accountability’ is followed by a more detailed account of the obligations and roles given to CCGs under the Health and Social Care Act 2012<sup>4</sup>. A description of our methods is followed by results and discussion, with a final section summarising the implications of our findings.

### ***Definitions of accountability***

Mulgan<sup>8</sup> describes accountability as a ‘complex and chameleon-like term’ (p555), describing the extension of the idea beyond an original concern with being ‘called to account’ by some legitimate authority, to incorporate a multitude of additional concepts such as internal notions of personal responsibility and professional accountability to peers. Ryan and Walsh<sup>9</sup> argue that, driven by the so-called ‘new public management’ approach<sup>10</sup>, accountability in the public sector is particularly complex, with actors in public sector organisations being potentially accountable to multiple audiences, including an informed public as well as to ministers. In order to make sense of this complexity, in this paper we will use definition suggested by Bovens<sup>11</sup>: ‘[accountability is] a relationship between an actor and a forum, in which the actor has an obligation to explain his or her conduct, the forum can pose questions and pass judgement, and the actor may face consequences’. This definition brings into focus the notion of authority, alongside the potential for judgement and sanctions. However, it leaves open the currency of accountability: for what aspects of his/her ‘conduct’ must an actor answer? A number of authors have addressed this question<sup>12-14</sup>. Leat<sup>15</sup> offers a fourfold classification: fiscal accountability, focusing upon expenditure and financial probity; process accountability, exploring the adequacy of procedures for decision making; accountability for priorities, providing justification for the way in which an organisation has focused its activities; and programme accountability, by which an actor is held to account for the outcomes of their activity. Turning to the question of sanctions, Brinkerhoff<sup>12</sup> sketches the idea of a spectrum, from accountability as the provision of



1  
2  
3 information about an organisation's actions at one end, through the additional requirement to  
4 justify those actions, to a sanction-backed formal 'answerability', in which different types of  
5 sanctions may be enforced in order to ensure compliance, at the other. This provides a useful lens  
6 through which to consider the strength of any particular accountability relationship.  
7  
8  
9  
10  
11

12  
13 Accountability thus defined encompasses both what Day and Klein<sup>16</sup> call 'managerial  
14 accountability'; that is, accountability as a largely technical process, by which those with  
15 delegated authority are held to account against clearly specified criteria, agreed in advance and  
16 'political accountability', by which those with delegated authority are answerable for their  
17 actions to the public. In this latter form of accountability, the criteria for judgment are  
18 themselves subject to debate, and it is characterised by reasons, justification and explanations of  
19 behavior (ibid p26), rather than by technical assessment against specified criteria. Such  
20 accountability is rarely backed by any form of sanctions other than the possibility that those  
21 involved might be subject to a democratic process or public opprobrium. In the real world,  
22 simple separation between these two forms of accountability rarely exists,<sup>16</sup> p28, but the  
23 distinction remains analytically useful, as it provides a framework within which to think about  
24 public accountability, which is rarely tied to specific performance criteria (unlike managerial  
25 accountability). Furthermore, political accountability carries the possibility that moral and ethical  
26 dimensions of performance might be incorporated into the accountability framework.  
27  
28  
29  
30  
31  
32  
33  
34  
35  
36  
37  
38  
39  
40  
41  
42  
43  
44

45  
46 Taking these definitions together, four key questions emerge. Firstly, any study of  
47 accountability must ask 'to whom are these actors accountable?' Secondly, we can ask:  
48 'accountable for what?', exploring the different types of activities and outcomes which might be  
49 tested. Thirdly, we need to explore how far particular accountabilities are underpinned by  
50 sanctions, and what enforcement mechanisms exist. Finally, following Day and Klein<sup>16</sup>, it is  
51 important to distinguish between a managerial accountability, in which the criteria of judgment  
52  
53  
54  
55  
56  
57  
58  
59  
60

1  
2  
3 are relatively clear, and political accountability, in which the key is producing a plausible  
4  
5 argument about actions and decisions.  
6  
7

### 8 ***The role and functions of Clinical Commissioning Groups***

9  
10 Since the introduction of the quasi-market into the NHS there has been an ambition to involve  
11  
12 front line primary care physicians more closely in purchasing care for their patients. Examples  
13  
14 include: GP fundholding, Total Purchasing Pilots, GP Commissioning groups, Primary Care  
15  
16 Groups and Practice-based Commissioning<sup>17</sup>. Each of these previous attempts at involving  
17  
18 clinicians in commissioning shares one thing: alongside the clinical group there existed an  
19  
20 administrative body (initially the Health Authority, latterly the PCT) to take statutory and  
21  
22 financial responsibility. Under the HSCA 2012, no such administrative support exists, with  
23  
24 CCGs taking on full statutory responsibility from April 2013. From this date, CCGs have been  
25  
26 responsible for planning, agreeing, procuring and monitoring a full range of services for their  
27  
28 populations. The exact distribution of commissioning responsibilities between CCGs and other  
29  
30 new bodies, such as NHS England, is complex, but essentially CCGs are responsible for most  
31  
32 elective, urgent and community care<sup>18</sup>. In addition, they are responsible for improving the  
33  
34 quality of primary care services, and are under a duty to work co-operatively with the LA<sup>19</sup>.  
35  
36 Finally, they are under a duty to break even financially, and carry responsibility for ensuring that  
37  
38 they meet their obligations with regard to safeguarding children and other general duties such as  
39  
40 complying with Equalities legislation  
41  
42  
43  
44  
45  
46  
47

### 48 ***Methods***

49  
50 The study took place between September 2011 and June 2012. Data collection involved both in  
51  
52 depth case studies in 8 emerging CCGs<sup>2</sup>, and national web surveys carried out at two points in  
53  
54  
55  
56

57  
58 <sup>2</sup> CCGs are not formally established until they have been through the authorisation process. At the time of this  
59 research, CCGs were technically sub-committees of their local PCT, and should properly be referred to as  
60

time (December 2011 and April 2012). In this paper we focus upon the results from the qualitative case studies. For a full description of the methods see Checkland et al<sup>20</sup>

The 8 case study sites were selected to provide maximum variety across a number of characteristics, including: size; the homogeneity of the socio-demographic profile of the site; and the complexity of the local health economy and local government institutions.

Table 1: Site characteristics

| Site   | Size (quintile) | Socio-demographic profile                                | Major providers | Local Authorities |
|--------|-----------------|----------------------------------------------------------|-----------------|-------------------|
| Site 1 | 3               | Mixed                                                    | 1               | >1                |
| Site 2 | 5               | Relatively homogeneous, pockets of deprivation           | > 1             | 1                 |
| Site 3 | 5               | Relatively homogeneous, affluent, pockets of deprivation | > 1             | >1                |
| Site 4 | 2               | Relatively homogeneous, deprived                         | > 1             | 1                 |
| Site 5 | 3               | Relatively homogeneous, deprived                         | 1               | >1                |
| Site 6 | 2               | Relatively homogeneous, affluent                         | 1               | 1                 |
| Site 7 | 4               | Mixed                                                    | > 1             | 1                 |
| Site 8 | 4               | Mixed                                                    | 1               | 1                 |

The smallest sites covered a population of 88,000-138,000, whilst the largest were responsible for a population of >500,000. Data collection involved observation of a wide variety of different types of meetings, semi-structured interviews and analysis of available documents such as meeting minutes, strategy plans and draft constitutions. In total we observed 439 hours of meetings and carried out 96 interviews (see table 2). Meetings included, for example, CCG Governing Body meetings, working group meetings, and meetings of the local Health and Wellbeing Board.

---

emerging', 'aspirant' or 'Pathfinder' CCGs. However, in order to make the paper more readable, the term 'emerging' is omitted, using the shorthand of 'CCG' to refer to the groups putting themselves forward for authorisation.

Table 2: Interviews

| Type of respondent              | Number interviewed | Number of interviews (some interviewed twice) |
|---------------------------------|--------------------|-----------------------------------------------|
| Managers (NHS)                  | 47                 | 49                                            |
| GPs                             | 33                 | 36                                            |
| Lay members                     | 5                  | 5                                             |
| Practice Managers               | 3                  | 3                                             |
| Nurse (Clinical lead)           | 1                  | 1                                             |
| Others (eg Trust manager)       | 1                  | 1                                             |
| Local Authority Representatives | 1                  | 1                                             |
| <b>Total</b>                    | <b>91</b>          | <b>96</b>                                     |

Interviews were recorded and transcribed, and detailed contemporaneous fieldnotes were written in meetings. These data sources were analysed alongside available documents (including those produced locally and guidance issued by the Department of Health/NHSCB) using the qualitative data analysis software Atlas ti. We also examined available constitutional documents for our case study sites.

For this paper, the analysis focused upon the ways in which ideas of accountability surfaced in all of the data sources, looking to answer the following questions:

- To whom are developing CCGs formally accountable, and to whom do they regard themselves as being accountable?
- For what aspects of their performance do they expect to provide an account to each stakeholder?
- What sanctions might apply?
- What (if any) potential conflicts or problems can be identified in the new system?

## ***Results and discussion***

In the following section, the results from the study will be presented. We identified two main forms of accountability relationships of concern to the groups: accountability to external groups; and internal accountability.

### **External Accountability**

#### Relationship with the NHS Commissioning Board (later renamed 'NHS England')

The NHSCB provided a 'model constitution framework'<sup>21</sup>, which CCGs were encouraged to adapt for their own purposes. This makes it clear that CCGs are formally accountable to the NHSCB and, through the NHSCB mandate<sup>22</sup>, to the Secretary of State for Health:

5.4.1. The group will

- a) comply with all relevant regulations;
- b) comply with directions issued by the Secretary of State for Health or the NHS Commissioning Board; and
- c) take account, as appropriate, of documents issued by the NHS Commissioning Board.<sup>21</sup>

The 'regulations' referred to are pieces of secondary legislation. The potential accountabilities here are both broad and as yet undefined. In addition to general duties (such as a duty to promote integration, a duty to involve the public) first set out in earlier documents<sup>18</sup>, the model constitution sets out some specific financial duties, including: the need to maintain expenditure within agreed limits; the duty to 'take account' of directions issued by the NHSCB; and the requirement to 'publish an account' of how additional payments had been spent<sup>21</sup> para 5.3).

As well as this essentially fiscal accountability, CCGs are also accountable for outcomes, set out in the form of a new 'Clinical Commissioning Group Outcomes indicator set' (CCGOIS). This was first mooted in the White paper, 'Equity and Excellence: Liberating the NHS':

1  
2  
3 A new NHS Outcomes Framework will provide direction for the NHS. It will  
4 include a focused set of national outcome goals determined by the Secretary of  
5 State, against which the NHS Commissioning Board will be held to account,  
6 alongside overall improvements in the NHS. In turn, the NHS Outcomes  
7 Framework will be translated into a commissioning outcomes framework for GP  
8 consortia, to create powerful incentives for effective commissioning. <sup>1</sup> p22)

9  
10  
11  
12 The indicators that have been published so far vary in scope, from those focused upon reducing  
13 mortality to those requiring the provision of particular services, such as ensuring patients with a  
14 stroke have a visit from a specialist nurse (<http://www.nice.org.uk/aboutnice/cof/cof.jsp>).

15  
16  
17  
18  
19  
20 Guidance issued in December 2012 <sup>23</sup> suggests that, in addition to a payment for meeting target  
21 thresholds on these indicators, what Leat <sup>15</sup> calls ‘programme accountability’ for these outcomes  
22 will form part of the NHSCB’s overall annual assessment of CCG performance.  
23  
24

25  
26  
27 The first hurdle for CCGs to pass was the requirement to be ‘authorised’ by the NHSCB.  
28 This process involved the submission by CCGs of evidence under six ‘domains’ relating to a  
29 strong clinical and professional focus, patient and public engagement, good governance  
30 arrangements, collaboration and good leadership. Those CCGs not deemed ready for full  
31 authorisation were initially ‘authorised with conditions’. Whilst public comments by the  
32 Secretary of State for Health Andrew Lansley initially implied that such conditions would be  
33 minimal or rare <sup>24</sup>, in practice, only 43 out of 211 CCGs achieved authorisation without  
34 conditions, 158 had conditions imposed and 10 had significant conditions backed by legal  
35 directions.  
36  
37  
38  
39  
40  
41  
42  
43  
44  
45  
46  
47

48 Once authorised, the guidance states:

49  
50  
51 **Annual assessment:** once authorised (with or without conditions), each CCG is  
52 subject to an annual assessment. This will consider how well a CCG has  
53 performed its functions in that year, and as part of that assessment, determine the  
54 nature of support or conditions going forward, based on its performance and other  
55 aspects of its organisational capabilities and relationships, and will enable the  
56 continued development of CCGs. <sup>25</sup> p11  
57  
58  
59  
60

1  
2  
3 The requirements against which this ‘assessment’ will be made have not yet been set out,  
4  
5 although it seems likely that the CCGOIS will be involved.<sup>26</sup>  
6  
7

8 It is thus clear that CCGs will be held accountable by the NHSCB, and that this will be  
9  
10 backed up by sanctions, including loss of ability to function as an autonomous statutory body,  
11  
12 and loss of income (the ‘quality premium’ will be tied to performance against the CCGOIS). The  
13  
14 accountability implied here is a managerial one, backed up by explicit performance measures.  
15  
16

17 We found that this significant formal (and sanction-backed) accountability to the NHSCB  
18  
19 was recognised in the draft constitutions under development in our case study sites, with most  
20  
21 carrying unchanged the language provided by the model documents. However, those involved  
22  
23 with setting up CCGs in our case study sites did not seem to have appreciated either the extent of  
24  
25 these obligations or their potential impact. Indeed, across 439 hours of observation and 96  
26  
27 interviews, there were only three references to ‘being held to account’ by the NHSCB.  
28  
29 Furthermore, although it was known that there would be an ‘outcomes framework’, this was also  
30  
31 rarely mentioned. It may be that this was in part a function of the timing of our data collection,  
32  
33 which took place before the NHSCB was formally constituted and before the draft CCGOIS was  
34  
35 published. However, it still seems worthy of remark that the discourse within our case study  
36  
37 CCGs showed little apparent recognition of the extent of the external accountability regime to  
38  
39 which they will be subject. When accountability to the wider NHS *was* discussed, the most  
40  
41 common type of accountability mentioned was fiscal accountability. Furthermore, in response to  
42  
43 an open-ended question in our second web-based survey (followed up in subsequent telephone  
44  
45 interviews) about their ongoing relationship with the NHSCB, by far the largest category of  
46  
47 responses were those calling for the NHSCB to give CCGs freedom, imposing few burdens such  
48  
49 as reporting requirements, targets or other forms of performance management.  
50  
51  
52  
53  
54  
55  
56  
57  
58  
59  
60



### Accountability to the public

Clause 4.5 of the model draft constitution provided by the NHSCB is headed 'Accountability'. It appears to construe this largely in the relatively weak sense of transparency, listing a series of mechanisms the CCG will use to 'demonstrate accountability':

4.5.1. The group will demonstrate its accountability to its members, local people, stakeholders and the NHS Commissioning Board in a number of ways, including by:

- a) publishing its constitution;
- b) appointing independent lay members and non GP clinicians to the group's governing body;
- c) holding meetings of the group's governing body in public (except where the group considers that it would not be in the public interest in relation to all or part of a meeting);
- d) publishing annually a commissioning plan;
- e) complying with local authority health overview and scrutiny requirements;
- f) meeting annually in public to publish and present its annual report;
- g) producing annual accounts in respect of each financial year which must be externally audited;
- h) having a published and clear complaints process;
- i) complying with the Freedom of Information Act 2000;
- j) providing information to the NHS Commissioning Board as required;
- k) publishing the group's principal commissioning and operational policies.

Most of our case study CCGs adopted this clause as it stands for their constitutions, although two sites omitted clause k.

In contrast to their relative silence about their future relationship with the NHSCB, our case study CCGs appeared keenly aware of the need to be accountable to their patients and the public. This GP expressed this clearly:

I think what we haven't done yet and what we're trying to organise now ... is go one step further and recognise that we are after all accountable to the public, we're there to serve them, we are paid by them, we're there to provide their health needs  
[GP ID 200]

1  
2  
3 The same GP went on to describe a pilot programme to engage local people in discussions about  
4  
5 service developments, arguing that setting up robust mechanisms would in some way protect  
6  
7 them against the centralising tendencies of the NHSCB:  
8  
9

10       ‘that will give true public accountability to the CCGs and Health and Wellbeing  
11       Boards and I think it will be very hard for agencies like the NHSCB to argue  
12       against it if the public back it. So I think that counteracts the fear of centralisation  
13       in the new reforms. [GP ID 200]  
14  
15

16  
17 Mechanisms for ensuring accountability to the public were in the early stages of development at  
18  
19 the time of our data collection. Holding meetings in public was seen as important, but there were  
20  
21 some concerns. One site had set up these meetings with the opportunity for the public to ask  
22  
23 questions only at the beginning of the meeting, rather than at the end when they might have been  
24  
25 able to respond to what they had heard. In an interview we were told:  
26  
27

28  
29       I don't know why they've set it up this way to be honest. I haven't been involved  
30       in that, so I don't know what the rationale is. I've got a feeling that was how the  
31       PCT used to operate, but I might be wrong. I mean I think if we're trying to  
32       engage with our public, but only allow them to speak at the beginning, before  
33       we've actually said anything...it does rather go against the ethos, I think  
34       [Manager ID 122]  
35  
36

37  
38 There was a general awareness that meeting in public alone will not ensure true public  
39  
40 accountability, and all of our study site CCGs were intending to set up additional forums for  
41  
42 patients and the public to become involved with the work of the CCG, including patient forums,  
43  
44 community involvement groups, public events and the publication of newsletters. They thus  
45  
46 showed a significant rhetorical commitment to the essentially political accountability represented  
47  
48 by so-called ‘public accountability’, but, at the time of data collection, arrangements to put this  
49  
50 in practice were rudimentary and did not yet differ significantly than those set up by their  
51  
52 predecessor organisations, PCTs  
53  
54  
55  
56  
57  
58  
59  
60

1  
2  
3 CCGs are also required to have at least two Lay members on their Governing Body<sup>27</sup>. In  
4  
5 practice, those appointed as ‘Lay’ members in our case study sites tended to be people with past  
6  
7 NHS experience, with ex-Non-executive Directors of PCTs a popular choice. PCTs were  
8  
9 required to have a majority of Non-executive directors, so that the executive directors could be  
10  
11 out-voted if necessary. This will not be the case in CCGs, suggesting that, on paper at least, the  
12  
13 ‘public’ voice within CCGs’ governing bodies will be less powerful than it has been in past NHS  
14  
15 commissioning bodies.  
16  
17  
18

19  
20 In addition to these CCG-led approaches to public accountability, the HSCA 2012  
21  
22 establishes new bodies called Local Healthwatch<sup>1</sup>. These organisations did not exist at the time  
23  
24 of our data collection, but official documents suggest that they will be expected to scrutinise  
25  
26 CCGs’ performance and hold them to account in some way, although the mechanisms by which  
27  
28 this will take place are far from clear.  
29  
30

### 31 Other external accountabilities

32  
33  
34 CCGs also have some external accountability to other organisations. These include the  
35  
36 economic regulator, Monitor (responsible for ensuring that CCGs adhere to competition rules);  
37  
38 Health and Well-being Boards (HWB); local LA Overview and Scrutiny Committee (OSC); and  
39  
40 the Local Medical Committee (LMC). The LMC is the local representative body for GPs.  
41  
42 Members are elected from the local GP population, and historically LMCs have played a role in  
43  
44 negotiating with PCTs on behalf of GPs in their role as providers of services.  
45  
46  
47

### 48 *Monitor*

49  
50 Under the HSCA 2012, Monitor is the economic regulator of the whole NHS system,  
51  
52 including promoting competition between providers of care. It is empowered to require CCGs to  
53  
54 account for their behavior with respect to procurement, and this accountability will be formally  
55  
56 backed up by the sanctions of competition law. At the same time, Monitor is required to promote  
57  
58  
59  
60

1  
2  
3 integration and co-operation between providers of health services (HSCA 2012 section 66). It  
4  
5 remains to be seen how these apparently conflicting responsibilities will play out. At the time of  
6  
7 our fieldwork, the future role of Monitor impinged little on our case study sites. This is not  
8  
9 surprising, as at this time, the details of how Monitor's future role will operate are not yet fully  
10  
11 developed at national level.  
12  
13

#### 14 15 *Accountability relationships with the Local Authority (LA)* 16

17  
18 Health and Wellbeing Boards are new LA bodies which are responsible for setting the  
19  
20 strategic direction for health and social care, leading the formal assessment of local needs. These  
21  
22 are in differing states of development across the country, and at the time of data collection it was  
23  
24 unclear how the mutual 'holding to account' between HWBs and CCGs would operate in future.  
25  
26 HWBs are responsible for developing the annual Joint Strategic Needs Assessment (JSNA), and  
27  
28 CCGs are required to 'take account' of this in developing their own strategic plans. CCGs have  
29  
30 representatives on their local HWB, and will therefore be party to the JSNA development.  
31  
32 Should the HWB consider that the CCGs plans do not fit within it, they will be able to ask the  
33  
34 CCG to 'provide an account' to explain why this is the case. However, no sanctions exist should  
35  
36 the CCG continue to disregard the HWB. Whilst it remains early days, our study found evidence  
37  
38 of two approaches to this developing relationship<sup>28</sup>. In some sites, the CCGs appeared to see  
39  
40 themselves as an integral and important part of the development of the HWB, seeing themselves  
41  
42 as 'co-owners' of the HWB with the Local Authority. In other areas, we saw HWBs developing  
43  
44 separately, with the CCG representatives present at meetings but apparently seeing themselves as  
45  
46 representing the CCG rather than as partners in the HWB process. It remains to be seen how  
47  
48 these differing approaches develop over time, and how HWBs will react should CCGs decide to  
49  
50 disregard their concerns.  
51  
52  
53  
54  
55  
56  
57  
58  
59  
60

1  
2  
3 The other key LA accountability mechanism is via the Overview and Scrutiny (O&S)  
4 process. Historically, O&S Committees (OSCs) were empowered to examine any ‘significant’  
5 changes to local services, requiring relevant NHS senior managers to attend and explain their  
6 plans. Should the committee be unconvinced, they had the power to refer the proposed change to  
7 the Secretary of State for Health. It was initially proposed that this scrutiny function would be  
8 assumed by HWBs, but after some debate, it was decided that LAs should retain it as a separate  
9 function<sup>29</sup>. However, considerable uncertainties remain as to how this will function in practice  
10  
11  
12  
13  
14  
15  
16  
17  
18  
19  
20  
21  
22  
23  
24  
25  
26  
27  
28  
29  
30  
31  
32  
33  
34  
35  
36  
37  
38  
39  
40  
41  
42  
43  
44  
45  
46  
47  
48  
49  
50  
51  
52  
53  
54  
55  
56  
57  
58  
59  
60

<sup>19</sup>. Given the early stages of development of the new structures, it is not surprising that the majority of respondents in our case study sites were as yet little concerned with their obligations to account for themselves before the local OSC. This manager expressed some skepticism:

To be honest with you, I didn’t really understand why we were held to account by the OSC because... especially if they don’t understand the area of work that we’re talking about. If you go in and talk about diagnostics and how we’re going to reconfigure that in the health economy, really, they wouldn’t really know what... so I think it’s... I think it’s useful for some things, the joint initiatives like... like the stability, transport and all those sort of things that kind of have a cross-cutting effect, but I’m not really sure that it’s useful for the specific health issues.  
[manager ID 152]

Others were more positive, describing the O&S process as ‘helpful’ in the past in refining and developing plans.

#### *Local Medical Committees*

Finally, many of our CCGs were keen to include their Local Medical Committee in discussions of their development plans. LMCs have no formal role in CCG development, but those we studied were aware that to antagonise the LMC could carry significant consequences in terms of member engagement. Many utilised the LMC to organise the elections to their board, and continued to liaise and consult with the group. In one site we witnessed a long discussion about the future relationship between the CCG and the local LMC. The LMC had requested

1  
2  
3 regular formal meetings with the CCG Governing Body, but the CCG resisted this, agreeing that  
4  
5 they should engage, but suggesting that frequent meetings would be unnecessarily burdensome.  
6  
7  
8 The CCG lay member commented: ‘now you [as GPs] are directly responsible, you are the  
9  
10 accountable body and the LMC have no role to hold you to account’. Another group included  
11  
12 this clause in their constitution:  
13

14  
15 The LMC  
16 3.6.1 The CCG recognises [local] Local Medical Committee as the statutory  
17 representative body of general practice for provider purposes in relation to local  
18 primary care contracts. There will also be full observer status for the LMC on the  
19 CCG Governing Body and the Chair of the CCG will regularly attend meetings of  
20 the LMC by invitation to provide updates, briefings and respond to individual  
21 areas of concern. Other opportunities for engagement (such as Locality Link  
22 Members) will be set out in the member practice engagement strategy. The LMC  
23 also plays an important role in independently running the election process for  
24 Locality GP representation.’  
25  
26  
27  
28

### 29 *Overlapping accountabilities*

30  
31 It is thus clear that CCGs are subject to a wide range of external accountabilities. The most  
32  
33 clearly developed of these is the accountability to the NHS England, but it is also clear that a  
34  
35 wide range of other bodies feel that they have a role. The extent of these external accountabilities  
36  
37 was experienced as problematic at times, with one manager commenting:  
38  
39

40  
41 ...there's people in the rest of the NHS are trying to work out what their roles are.  
42 You know, I have had four demands this week from different places for a slightly  
43 different perspective report on the same topic, and not just a report but then turn  
44 up and tell them and assure them you're doing something about it. And that's just  
45 on the one topic. That's the world we're living in. And while you're satisfying that  
46 world, it's very difficult to focus on what your organisation should be doing.  
47  
48 [manger ID 173]  
49  
50

### 51 **Internal accountability**

52  
53 CCGs are membership organisations, and this is said to be one of the key strengths of the  
54  
55 new structures<sup>30</sup>. As such, there is a two-way accountability relationship between the CCG  
56  
57  
58  
59  
60

1  
2  
3 Governing Body and the practices who are members, as well as accountabilities between the  
4  
5 various working groups within the CCG.  
6  
7

#### 8 Members' accountability to the CCG 9

10 The CCGs in our study were clear that their practice members would be in an  
11  
12 accountability relationship with the CCG, and this relationship was one in which the CCG would  
13  
14 'hold practices to account' for their behaviour, including such things as referral practices and  
15  
16 prescribing. This manager described it thus:  
17  
18

19  
20 Q: What would you claim to be the early success of a CCG? I mean you, how  
21 would you see it?

22 A: That's a very good question [laughter]. I think... one of things it has done is it  
23 has got more GPs involved and more GPs talking to one another and looking at  
24 their referral patterns and realising that ... they are accountable rather than it  
25 maybe just being one person for a practice being the person who goes to this  
26 meeting, comes back and everybody goes oh, well that's fine and just ignores it. I  
27 think there is certainly an additional...almost accountability, a buy in from more  
28 GPs across the patch. [Manager ID 254]  
29  
30  
31  
32

33 In many sites the relationship between practices and the wider group is governed by a written  
34  
35 agreement, called an 'accountability' or 'membership' agreement:  
36  
37

38 If you're working as a CCG and you've... signed up to your accountability  
39 agreement and everyone's in it together, you can't have some practices  
40 overspending ridiculously and some desperately trying to make savings. You  
41 know, that's not... I don't think that's on. [GP ID 37]  
42  
43  
44

45 These agreements were usually developed in addition to the CCG constitution, and set out  
46  
47 mutual obligations within the group. Thus, for example, in Site 3 the 'membership agreement'  
48  
49 forms an appendix to the formal constitution of the group. It sets out what the CCG will provide  
50  
51 for practices (such as the provision of timely information, educational events and prescribing  
52  
53 support) and stipulates the following practice obligations:  
54  
55

- 56 • To share named information by practice for peer review  
57  
58  
59  
60



- To actively participate in demand management using specified tools
- To actively communicate with other members, the locality and the CCG as a whole
- To develop a framework for quality within the practice
- To agree and sign up to the terms of the Constitution.
- If any member practice fails to meet agreed targets, they agree to work on and implement a development plan.
- To provide a practice patient representative for the patient and public engagement body
- To name a practice lead for Clinical Commissioning
- To work on and implement care closer to home pathways
- To actively manage the devolved budget to assist financial balance and QIPP
- To support robust and effective clinical, financial and operational risk management across the CCG [Extract from Membership agreement Site 3]

Such agreements suggest a degree of voluntarism, by which practices are ceding some sovereignty to the wider group, in return for receiving support and access to the resources of the group. However, CCG membership is compulsory for all practices in England, so this voluntarism is in practice somewhat illusory:

A membership agreement had been drawn up (see associated documents). This has to be signed by all GPs. [GP lead] asked how best to go about this. He also pointed out that this agreement is not a legally binding document. After some discussion it was agreed to send out the document to practice managers and ask them to oversee the process and [manager] was asked to follow up those that did not return the signed agreement. [participant] asked if they should plan for those who refuse to sign. [GP lead] said: there is no choice! [Extract from fieldnotes, Locality meeting ID M54]

It also remains unclear what sanctions might apply, should practices break the terms of these agreements. One CCG constitution suggests that practices failing to keep to the agreement would have to 'give an account' firstly to their local peers, and subsequently to the CCG board, but no

1  
2  
3 sanctions and timescales are specified. Such agreements must walk a fine line, as performance  
4  
5 management of GPs with respect to their clinical practice will be the responsibility of NHSE, and  
6  
7 there has been national concern to ensure that CCGs do not stray into this aspect of practice<sup>31</sup>.  
8  
9

### 10 Accountability to members

11  
12 The formal accountability of the CCG to its constituent members is mainly promulgated  
13  
14 through the accountability of its governing body to the members; and of the specific officers of  
15  
16 the CCG (being the Chair, Accountable Officer (AO) and Chief Financial Officer (CFO)) to the  
17  
18 CCG. One aspect of accountability is the ability to dismiss those who do not perform well. The  
19  
20 general principle for CCGs is that members elect their governing body and chair for time limited  
21  
22 terms. But the model constitution does not specify exactly how the governing body, officers and  
23  
24 committees should be elected and dismissed, and there is some variation in how this has been  
25  
26 arranged in the constitutions adopted in the study sites. The governing body is accountable to the  
27  
28 members for the running of the CCG in accordance with its constitution. Clause 7.3.1. of the  
29  
30 model constitution explains how  
31  
32  
33  
34

35  
36 ‘each member of the governing body should share responsibility as part of a team  
37  
38 to ensure that the group exercises its functions effectively, efficiently and  
39  
40 economically, with good governance and in accordance with the terms of this  
41  
42 constitution’

43  
44 The officers of the CCG are also accountable to the governing body of the CCG, and through  
45  
46 that to the CCG membership. Each CCG’s draft constitution sets out its own requirements for  
47  
48 appointment and removal. For example, the chair in one site must be a ‘provider of primary  
49  
50 medical services’ who is elected by ‘qualifying providers of primary medical services’. There is  
51  
52 a two to four year term, renewable to a maximum of ten years. Some of the constitutions state  
53  
54 circumstances in which the chair would be obliged to stand down, for example in another site, if  
55  
56 the chair  
57  
58  
59  
60

1  
2  
3 'has behaved in a manner or exhibited conduct which has or is likely to be  
4 detrimental to the reputation and interest of the group and is likely to bring the  
5 group into disrepute. This includes but is not limited to dishonesty,  
6 misrepresentation (either knowingly or fraudulently), defamation of any member  
7 of the governing body, abuse of position, non declaration of a known conflict of  
8 interest, seeking to lead or manipulate a decision of the governing body in a  
9 manner that would ultimately be in favour of that person whether financially or  
10 otherwise;'  
11  
12

13  
14  
15 As might be expected as CCGs were in the process of establishing themselves, we witnessed  
16 considerable discussion about these internal governance issues within the groups. In meetings  
17 and in interviews comments were made about the following accountabilities:  
18  
19

- 20 • The CCG Governing Body is accountable to the members
- 21 • Locality groups are accountable to the Governing Body
- 22 • Sub-committees are accountable to the Governing Body
- 23 • Employed officers are accountable to the Governing Body
- 24 • Elected Governing Body members are accountable to the membership

25  
26  
27 However, such discussions rarely included any mention of either the mechanisms by which  
28 such accountabilities would be promulgated, or the sanctions that might apply. In practice, our  
29 findings suggest that the main mechanism by which these accountabilities will be enforced is by  
30 information sharing and transparency, with Governing Bodies receiving reports from sub groups  
31 and Localities, and in turn reporting on their activities to assemblies of members. This would  
32 seem to be a form of *political* accountability, with the respective groups making an argument and  
33 providing justifications for their actions, with no explicit performance measures and few  
34 available sanctions. The only area in which there would seem to be some possible formal  
35 sanctions is in the election/selection of officers such as Chair and AO, as discussed above. It is  
36 also conceivable that a CCG Governing Body which had lost the confidence of its membership  
37  
38  
39  
40  
41  
42  
43  
44  
45  
46  
47  
48  
49  
50  
51  
52  
53  
54  
55  
56  
57  
58  
59  
60

1  
2  
3 might find that practices informally withdrew their co-operation; whether the Governing Body  
4  
5 could use its authority to prevent this is unclear.  
6  
7

## 8 *Summary*

9  
10 Our study shows that CCGs are subject to a complex web of accountability relationships.  
11  
12 The strongest form of accountability would seem to be their accountability to NHS England  
13  
14 (NHSCB), backed by sanctions and subject to annual assessment. Furthermore, the currency of  
15  
16 this accountability is clearly established, encompassing fiscal accountability and programme  
17  
18 accountability for the COGIS. The accountability to other external bodies such as HWB is, by  
19  
20 contrast, much weaker, and less clearly defined, with CCGs required to ‘give an account’, with  
21  
22 no associated sanctions. Accountability to Monitor may be more formal, as it would seem that  
23  
24 Monitor will be empowered to enforce competition law, although how this will operate in  
25  
26 practice is as yet unclear. Accountability to the public is a political accountability, focused upon  
27  
28 the relatively weak notion of ‘transparency’, with no associated sanctions. Internal accountability  
29  
30 is similarly complex, with a mix of mutual and one way relationships, some accompanied by the  
31  
32 ultimate sanction of voting out office holders. Practices are said to be ‘held to account’ if they  
33  
34 transgress the rules of the group, but it is unclear as yet if they could be ejected, as all practices  
35  
36 must be a member of a CCG. These external accountabilities can be summarised in  
37  
38 diagrammatic form:  
39  
40  
41  
42  
43  
44  
45

46 Figure 2: CCG external accountabilities  
47  
48  
49  
50  
51  
52  
53  
54  
55  
56  
57  
58  
59  
60



29 Internal accountability relationships are similarly complex. Figure 3 summarises these,  
30 distinguishing between those bodies within CCGs which will hold each other to account, and  
31 those which are accountable:  
32  
33  
34

35  
36 Figure 3: CCG internal accountabilities

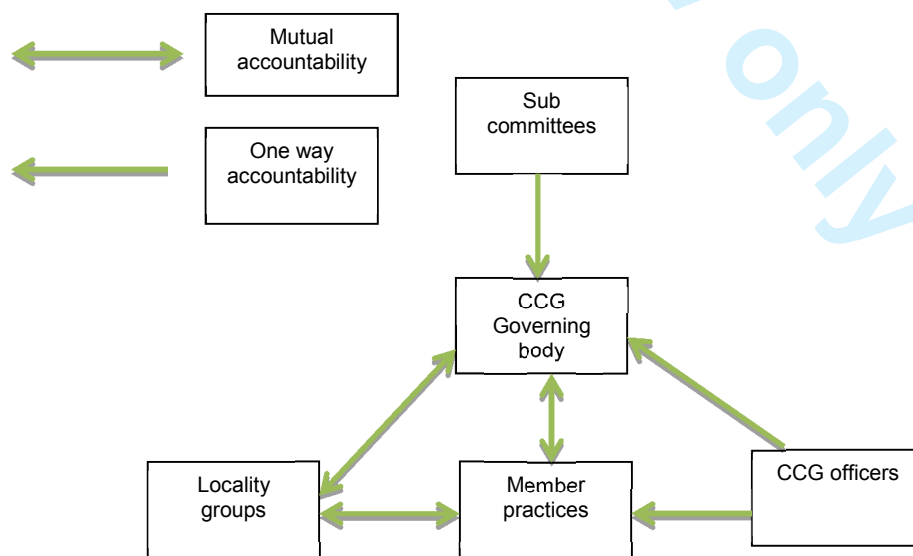

## *Discussion*

### **Principal findings and their implications**

The Health and Social Care Act 2012 promised ‘increased accountability’ as justification for the wide ranging NHS reforms in England. Our study suggests that CCGs will indeed be ‘more accountable’ than their predecessor organisations (Primary Care Trusts) in the sense that they will be accountable to a much wider range of organisations and bodies of people. Indeed, we have shown that CCGs are at the centre of a complex web of accountability relationships, both internal and external. However, whether this translates into being more responsive, or more easily held to account, remains to be seen.

In general, studies suggest that complex accountability arrangements tend to generate confusion<sup>32</sup>, and that, where organisations are accountable to multiple audiences, the interests of those audiences may differ, generating unintended consequences<sup>33</sup>. This may be important for CCGs, as they attempt to balance the demands of the multiple audiences to whom they are being asked to account. We have shown that, as things stand, the accountability relationship with NHS England is the only one in which the currency and focus of accountability is clearly set out, although even this managerial accountability remains untested. However, our study participants also showed a keen commitment to other, more political forms of accountability, and it is possible that in future, CCGs will choose to satisfy their public audiences rather than NHS England or the Department of Health. Thus, for example, NHS England has suggested that CCGs’ closeness to their members and their responsibility to account to local politicians via HWBs will make it easier to make difficult decisions about service reconfigurations<sup>34</sup> but it is equally likely that CCGs accountable to local politicians and to local people via daily contacts in their surgeries will avoid such hard decisions in the face of public opposition.

## Strengths and weaknesses

This study took place during the early phases of CCG establishment, and therefore provides a snap shot of a developing situation. However, the data collected were wide and deep, and the findings therefore provide a robust picture of the developing landscape of CCG accountability.

## Comparison with previous studies

It is instructive to compare CCGs with their predecessor organisations, Primary Care Trusts (PCTs). PCTs were straightforwardly accountable (via a managerial accountability regime, backed by the sanction that senior individuals could lose their jobs) to their local Strategic Health Authority, who were, in turn, accountable to the Secretary of State. In addition, they had a duty to account to patients and the public, consulting them and providing information about their decisions. In practice, the strong accountability backed by personal sanctions for the senior executives drove the agenda, with studies highlighting the clear distinction between ‘must do’ actions where one’s job could be at risk, versus those which could be negotiated or modified<sup>35</sup>. The potential distorting effect of this type of strong accountability has been well documented<sup>36</sup>. Senior staff in CCGs do not appear at present to be subject to personal sanctions in quite such an immediate way, and it will be interesting to explore over the coming months whether the threat of organisational sanctions will act to drive the agenda in a similar way.

It is too early for there to be any published empirical study of CCG accountability, although some commentaries have been published. In the most comprehensive of these, writing from a legal perspective, Davies<sup>37</sup> argues that the complex additional accountabilities to which CCGs are subject may, in practice, act to dilute the important central accountability to Parliament that the Act is ostensibly designed to promote.

## Unanswered questions



1  
2  
3 CCGs are responsible for significant amounts of public money, and it is important that they are  
4  
5 subject to scrutiny as they develop their new ways of working. This study provides an early look  
6  
7  
8 their developing accountability relationships, and highlights the complexity and potential  
9  
10 problems which may arise. It is vital that further work follows these finding up and explores in  
11  
12 depth the way in which the complex relationships identified here play out in practice over time.  
13  
14 Ultimately, the extent to which CCGs are felt to be truly accountable for their work will be an  
15  
16 important aspect of any overall judgment about the success of this significant reform programme.  
17  
18  
19  
20  
21  
22  
23  
24  
25  
26  
27  
28  
29  
30  
31  
32  
33  
34  
35  
36  
37  
38  
39  
40  
41  
42  
43  
44  
45  
46  
47  
48  
49  
50  
51  
52  
53  
54  
55  
56  
57  
58  
59  
60

## Declarations

### *Authorship*

All of the authors meet the criteria for authorship, and were involved in the design and data analysis of the study, and contributed to the drafting, revision and finalization of this paper. In addition, Julia Segar, Anna Coleman, Imelda McDernott, Christina Petsoulas and Kath Checkland took part in the data collection.

Ms Ros Miller and Dr Andrew Wallace (contributors) also took part in the data collection and analysis, and contributed to the final project report.

### *Competing Interests*

All of the authors received grant funding from the Department of Health via its Policy Research Programme for this research. No authors have had financial relationships with any organisations that might have an interest in the submitted work in the previous three years, and no authors have any other relationships or activities that could appear to have influenced the submitted work.

### *Acknowledgements*

The study was funded by the Department of Health via its Policy Research Programme. The study formed part of the programme of the Policy Research Unit on Commissioning and the Healthcare System. The views expressed here are those of the researchers and do not reflect the position of the Department of Health.

We are grateful to our participants who were very generous in allowing us access to their organisations at a time of considerable turmoil and change. A project advisory group provided valuable advice and support in the development and management of the study. We are grateful to Ros Miller and Andrew Wallace who undertook much of the fieldwork for us and who contributed to the analysis and final report.

Employees of the Department of Health were members of an advisory group which supported the conduct of the research, and commented on an initial draft of the study final report, but the findings are those of the authors. A draft of this paper was submitted to the Department of Health at the same time as it was submitted to the journal.

### *Ethical approval*

The study received ethical approval from NRES NW ref 0375.

## References

1. Department of Health. Equity and Excellence: liberating the NHS. London: The Stationary Office, 2010.
2. Cabinet Office. The Coalition: our programme for government. Freedom, fairness, responsibility. London: Cabinet Office, 2010.
3. Flynn R, Williams G, editors. *Contracting for health: quasi-markets and the NHS*. Oxford: Oxford university Press, 1997.
4. Health and Social Care Act. Department of Health, 2012.
5. NHS Commissioning Board. Developing commissioning support: Towards service excellence, 2012.
6. Department of Health. A short guide to NHS Foundation Trusts. London: The Stationary Office, 2005.
7. NHS Commissioning Board. Towards establishment: Creating responsive and accountable Clinical Commissioning Groups 2012.
8. Mulgan R. 'Accountability': an ever-expanding concept? *Public Administration* 2000;78(3):555.
9. Ryan C, Walsh P. Collaboration of public sector agencies: reporting and accountability challenges. *International Journal of Public Sector Management* 2004;17(7):621-31.
10. Hood C. A public management for all seasons? *Public Administration* 1991;69(1):3-19.
11. Bovens M. Analysing and Assessing Accountability: A Conceptual Framework1. *European Law Journal* 2007;13(4):447-68.
12. Brinkerhoff DW. Accountability and health systems: toward conceptual clarity and policy relevance. *Health Policy and Planning* 2004;19(6):371-79.
13. Friedman A. Beyond accountability for reasonableness. *Bioethics* 2008;22(2):101-12.
14. Yamin AE. Beyond Compassion: The Central Role of Accountability in Applying a Human Rights Framework to Health. *Health and Human Rights* 2008;10(2).
15. Leat D. *Voluntary organisations and accountability*. London: Policy Analysis Unit, National Council For Voluntary Organisations, 1988.
16. Day P, Klein R. *Accountabilities: five public services*. London and New York: Tavistock, 1987.
17. Miller R, Peckham S, Checkland K, Coleman A, McDermott I, Harrison S, et al. Clinical engagement in primary care-led commissioning: a review of the evidence. London: Policy Research Unit in Commissioning and the Healthcare System (PRUComm), 2012.
18. Department of Health. The Functions of GP Commissioning Consortia. A Working Document. *Gateway ref 15472*, 2011.
19. Coleman A, Harrison S. What next for health scrutiny? *Journal of Integrated Care* 2013;21(2):54-63.
20. Checkland K, Coleman A, Segar J, McDermott I, Miller R, Wallace A, et al. Exploring the early workings of emerging Clinical Commissioning Groups: Final report. . London: Policy Research Unit in Commissioning and the Healthcare System (PRUComm), , 2012.
21. NHS Commissioning Board. Model CCG Constitution Framework, 2012.
22. Department of Health. The Mandate: a mandate from the Government to the NHS Commissioning Board. London: The Stationary Office, 2012.
23. NHS Commissioning Board. Quality Premium: 2013/14 guidance for CCGs. Draft, 2012.

- 1
- 2
- 3
- 4 24. McLellan A. Lansley expects 'nearly all' CCGs to be authorised by deadline. *Health Service*
- 5 *Journal* 2012;14th June 2012.
- 6 25. Department of Health. Developing Clinical Commissioning Groups: towards authorisation.
- 7 London: The Stationary Office, Gateway Reference 16367, 2011.
- 8 26. Kaffash J. Revealed: CCG targets for quality premium. *Pulse* 2012;18th Dec 2012.
- 9 27. NHS Commissioning Board. Clinical commissioning group governing body members: role
- 10 outlines, attributes and skills. *October 2012*, 2012.
- 11 28. Coleman A, Checkland K, Segar J, et al. Joining it up? Health and Wellbeing in the new
- 12 English National Health Service organisation: Early evidence from Clinical
- 13 Commissioning Groups and shadow Health and Wellbeing Boards. *Local Government*
- 14 *Studies* In press.
- 15 29. Department of Health. Government response to the NHS Future Forum report *CM8113*,
- 16 2011.
- 17 30. NHS Commissioning Board. Clinical Commissioning Groups HR Guide. *May 2012*, 2012.
- 18 31. Iacobucci G. CCGs ramp up performance management of GPs as thousands sign inter-
- 19 practice agreements. *Pulse* 2012;23rd June 2012.
- 20 32. Dixon A, Storey J, Alvarez Rosete A. Accountability of Foundation Trusts in the English
- 21 NHS: Views of Directors and Governors. *Journal of Health Services Research & Policy*
- 22 2010;15(2):82-89.
- 23 33. Davies A. Tangled Web - Accountability and the Commissioning Role in the New NHS.
- 24 *King's College Law Journal* 2007;18(3):393.
- 25 34. NHS Commissioning Board. Clinical commissioning group authorisation: Draft guide for
- 26 applicants. *April 2012*, 2012.
- 27 35. Macfarlane F, Exworthy M, Wilmott M, et al. Plus ça change, plus c'est la même chose:
- 28 senior NHS managers' narratives of restructuring. *Sociology of Health & Illness*
- 29 2011;33(6):914-29.
- 30 36. Bevan G, Hamblin R. Hitting and missing targets by ambulance services for emergency calls:
- 31 effects of different systems of performance measurement within the UK. *Journal of the*
- 32 *Royal Statistical Society* 2009;172(1):161(30).
- 33 37. Davies ACL. This Time, it's for Real: The Health and Social Care Act 2012. *The Modern*
- 34 *Law Review* 2013;76(3):564-88.
- 35
- 36
- 37
- 38
- 39
- 40
- 41
- 42
- 43
- 44
- 45
- 46
- 47
- 48
- 49
- 50
- 51
- 52
- 53
- 54
- 55
- 56
- 57
- 58
- 59
- 60

1  
2  
3  
4  
5  
6  
7  
8  
9  
10  
11  
12  
13  
14  
15  
16  
17  
18  
19  
20  
21  
22  
23  
24  
25  
26  
27  
28  
29  
30  
31  
32  
33  
34  
35  
36  
37  
38  
39  
40  
41  
42  
43  
44  
45  
46  
47  
48  
49  
50  
51  
52  
53  
54  
55  
56  
57  
58  
59  
60

**Accountable to whom, for what? An exploration of the early development of  
Clinical Commissioning Groups in the English NHS**

**Kath Checkland, Pauline Allen, Anna Coleman, Julia Segar, Imelda McDermott, Stephen Harrison, Christina Petsoulas, Stephen Peckham.**

Dr Kath Checkland, Reader in Primary Care, Centre for Primary Care, University of Manchester, 5<sup>th</sup> Floor, Williamson Building, University of Manchester Oxford Road, Manchester M13 9PL

Dr Pauline Allen, Reader in Health Policy, Department of Health Service Research and Policy, London School of Hygiene and Tropical Medicine, 15-17 Tavistock Place, London WC1H 9SH

Dr Anna Coleman, Research Fellow, Centre for Primary Care, University of Manchester, 5<sup>th</sup> Floor, Williamson Building, University of Manchester, Oxford Road, Manchester M13 9PL

Dr Julia Segar, Research Associate, Centre for Primary Care, University of Manchester, 5<sup>th</sup> Floor, Williamson Building, University of Manchester Oxford Road, Manchester M13 9PL

Dr Imelda McDermott, Research Associate, Centre for Primary Care, University of Manchester, 5<sup>th</sup> Floor, Williamson Building, University of Manchester Oxford Road, Manchester M13 9PL

Prof Stephen Harrison, Professor of Social Policy, Centre for Primary Care, University of Manchester, 5<sup>th</sup> Floor, Williamson Building, University of Manchester Oxford Road, Manchester M13 9PL

Dr Christina Petsoulas, Research Fellow, Department of Health Service Research and Policy, London School of Hygiene and Tropical Medicine, 15-17 Tavistock Place, London WC1H 9SH

Prof Stephen Peckham, Professor of Health Policy, Centre for Health Services Studies, University of Kent, The Registry, Canterbury, Kent, CT2 7NZ

**Address for correspondence:**

**Dr Kath Checkland** Reader in Primary Care

Centre for Primary Care

Institute of Population Health

5<sup>th</sup> Floor, Williamson Building

University of Manchester

Oxford Road

Manchester M13 9PL

[Katherine.checkland@manchester.ac.uk](mailto:Katherine.checkland@manchester.ac.uk)

## Declarations

### *Authorship*

All of the authors meet the criteria for authorship, and were involved in the design and data analysis of the study, and contributed to the drafting, revision and finalization of this paper. In addition, Julia Segar, Anna Coleman, Imelda McDernott, Christina Petsoulas and Kath Checkland took part in the data collection.

Ms Ros Miller and Dr Andrew Wallace (contributors) also took part in the data collection and analysis, and contributed to the final project report.

### *Competing Interests*

All of the authors received grant funding from the Department of Health via its Policy Research Programme for this research. No authors have had financial relationships with any organisations that might have an interest in the submitted work in the previous three years, and no authors have any other relationships or activities that could appear to have influenced the submitted work.

### *Acknowledgements*

The study was funded by the Department of Health via its Policy Research Programme. The study formed part of the programme of the Policy Research Unit on Commissioning and the Healthcare System. The views expressed here are those of the researchers and do not reflect the position of the Department of Health.

We are grateful to our participants who were very generous in allowing us access to their organisations at a time of considerable turmoil and change. A project advisory group provided valuable advice and support in the development and management of the study. We are grateful to Ros Miller and Andrew Wallace who undertook much of the fieldwork for us and who contributed to the analysis and final report.

Employees of the Department of Health were members of an advisory group which supported the conduct of the research, and commented on an initial draft of the study final report, but the findings are those of the authors. A draft of this paper was submitted to the Department of Health at the same time as it was submitted to the journal.

### *Ethical approval*

The study received ethical approval from NRES NW ref 0375.

## Summary

### Article focus

It is claimed by the architects of the current reorganisation of the English NHS that the changes will increase accountability across the service. This article explores how this is playing out in practice, focusing upon the accountabilities to which newly formed Clinical Commissioning Groups (CCGs) are subject.

### Key messages

- The accountability arrangements for CCGs are considerably more complex than those experienced by their predecessor organisations, with multiple external accountabilities as well as internal accountability to members.
- There is potential for conflict between the different accountabilities, and it is unclear how far the aspiration for 'greater accountability' can be met
- This study is important, as it provides the first evidence about how CCGs are beginning to tackle their complex and developing role. It raises questions which future research must address.

### Strengths and limitations

This study took place during the early phases of CCG establishment, and therefore provides a snap shot of a developing situation. However, the data collected were wide and deep, and the findings therefore provide a robust picture of the developing landscape of CCG accountability.

### Data sharing

There is no additional data available.



1  
2  
3  
4  
5  
6  
7  
8  
9 **Accountable to whom, for what? An exploration of the early development of**  
10  
11 **Clinical Commissioning Groups in the English NHS**  
12

13 ***Abstract***

14  
15 *Objective:* One of the key goals of the current reforms in the English NHS under the Health and  
16 Social Care Act, 2012, is to increase the accountability of those responsible for commissioning  
17 care for patients (Clinical Commissioning Groups (CCGs)), whilst at the same time allowing  
18 them greater autonomy. This study set out to explore CCG's developing accountability  
19 relationships.  
20  
21  
22  
23

24  
25 *Design:* We carried out detailed case studies in eight CCGs, using interviews, observation and  
26 documentary analysis to explore their multiple accountabilities.  
27

28  
29 *Setting/participants:* We interviewed [91 people, including](#) GPs, managers and Governing Body  
30 members in developing CCGs, and [undertook 439 hours of observation observed in](#) -a wide  
31 variety of meetings.  
32  
33

34  
35 *Results:* CCGs are subject to a managerial, sanction-backed accountability to NHS England (the  
36 highest tier in the new organisational hierarchy), alongside a number of other external  
37 accountabilities to the public and to some of the other new organisations created by the reforms.  
38  
39 In addition, unlike their predecessor commissioning organisations, they are subject to complex  
40 internal accountabilities to their members.  
41  
42

43  
44 *Conclusions:* The accountability regime to which CCGs are subject is considerably more  
45 complex than that which applied their predecessor organisations. It remains to be seen whether  
46 the twin aspirations of increased autonomy and increased accountability can be realised in  
47 practice. However, this early study raises some important issues and concerns, including the risk  
48  
49  
50  
51

1  
2  
3  
4  
5  
6  
7  
8  
9 that the different bodies to whom CCGs are accountable will have differing (or conflicting)  
10 agendas, and the lack of clarity over the operation of sanction regimes.

### 11 **Introduction**

12  
13  
14  
15 ‘The Government’s reforms will liberate professionals and providers from top-  
16 down control. This is the only way to secure the quality, innovation and  
17 productivity needed to improve outcomes. We will give responsibility for  
18 commissioning and budgets to groups of GP practices; and providers will be freed  
19 from government control to shape their services around the needs and choices of  
20 patients. Greater autonomy will be matched by increased accountability to patients  
21 and democratic legitimacy, with a transparent regime of economic regulation and  
22 quality inspection to hold providers to account for the results they deliver.’<sup>1</sup>

23  
24 Having initially promised ‘no more top-down reorganisations of the NHS’<sup>2</sup>, the UK  
25 Coalition Government elected in 2010 immediately embarked on a radical overhaul of the NHS  
26 in England (the NHSs in Wales, Scotland and Northern Ireland are governed by the devolved  
27 authorities), with a reorganisation that affects most parts of the service. As this quote suggests,  
28 the driving force behind the reforms was a desire to ‘liberate’ professionals from top-down  
29 control, at the same time as making them more accountable. In brief, the changes maintain and  
30 extend the notion of a ‘quasi-market’ in the NHS, first introduced in the 1990s<sup>3</sup>. Overall  
31 responsibility for running the NHS has been removed from the Department of Health (DH) and  
32 handed to a new arm’s length body, NHS England<sup>1</sup>. Responsibility for commissioning  
33 (purchasing) the majority of services for a defined geographical population was historically held  
34 by Primary Care Trusts (PCTs). These organisations were managerially dominated, and were  
35 directly accountable to the Department of Health (ie the Health Ministry). The Health and Social  
36 Care Act<sup>4</sup> abolished PCTs (from 1/4/13), passing responsibility for commissioning to primary  
37 care physicians (General Practitioners, GPs) working together in local Clinical Commissioning  
38 Groups (CCGs). These groups were established as statutory bodies from 1/4/13, and are now

39  
40  
41  
42  
43  
44  
45  
46  
47  
48  
49  
50  
51  
52 <sup>1</sup> This body was initially called ‘the NHS Commissioning Board’ (NHSCB), but just prior to its formal establishment  
53 this was changed to NHS England. .

1  
2  
3  
4  
5  
6  
7  
8  
9 responsible for 65% of the overall budget of the NHS, covering a defined geographical area and  
10 commissioning routine and emergency care. NHS England (NHSE) will oversee CCGs, and will  
11 be responsible for commissioning some services (eg primary care, specialised services) at a  
12 national level. Managerial budgets for CCGs will be significantly less than was the case for  
13 PCTs, and they will be expected to ‘buy in’ managerial commissioning support from standalone  
14 organisations, known as ‘Commissioning Support Units’ (CSUs)<sup>5</sup>. Further regulation will be  
15 provided by Monitor, which is an arm’s length government body originally established to  
16 regulate quasi-independent NHS hospitals known as ‘Foundation Trusts’<sup>6</sup>. Monitor now has an  
17 expanded role as economic regulator of the new NHS system, responsible for the prevention of  
18 anti-competitive behaviour, the promotion of integration, setting prices within the system and  
19 ensuring service continuity. Responsibility for Public Health is transferred to Local Government  
20 Authorities (LAs), and new LA sub-committees known as Health and Well-being Boards (HWB)  
21 have been created, charged with setting the over-arching strategic direction for health and social  
22 care services across a geographical area. CCGs will be members of these bodies, and will be  
23 expected to set their own priorities in response to the strategic direction set by their local HWB.  
24  
25  
26  
27  
28  
29  
30  
31  
32  
33  
34  
35  
36

37 Thus, the new system creates a number of new bodies with significant responsibilities,  
38 and redefines relationships in significant ways, with an associated increase in complexity. This  
39 increase in complexity in part has come about because of the continued commitment by the UK  
40 government to the idea of a market in healthcare, a commitment shared by other governments  
41 across the world. However, markets require regulation, and recent scandals in England (such as  
42 [the recent significant failings of care at Mid Staffordshire NHS Trust](#)  
43 [\(http://www.midstaffpublicinquiry.com/\)](http://www.midstaffpublicinquiry.com/)) have demonstrated just how difficult that regulation  
44 can be. One of the official aspirations underpinning the creation of CCGs in England (as  
45 demonstrated by the quotation opening this article) is to enable greater accountability, and it is  
46  
47  
48  
49  
50  
51  
52  
53  
54  
55  
56  
57  
58  
59  
60

1  
2  
3  
4  
5  
6  
7  
8  
9  
10  
11  
12  
13  
14  
15  
16  
17  
18  
19  
20  
21  
22  
23  
24  
25  
26  
27  
28  
29  
30  
31  
32  
33  
34  
35  
36  
37  
38  
39  
40  
41  
42  
43  
44  
45  
46  
47  
48  
49  
50  
51  
52  
53  
54  
55  
56  
57  
58  
59  
60

clear from the brief description given above that the success of the new system will, to some extent, depend upon how successfully the new accountability relationships are established. However, in spite of very extensive documentation issued to guide CCGs as they established themselves (see <http://www.england.nhs.uk/resources/resources-for-ccgs/>, accessed June 2013) the exact nature of CCG accountability relationships remains ill-defined and somewhat ~~unspecified~~under-specified. One of the key guidance documents issued to CCGs was a guide to governance processes ([NHS Commissioning Board 2012f](#)). Accountability is referred to thus:

CCGs will have to **account to the patients and population** they serve as well as **being accountable to the NHS Commissioning Board (NHS England)**. This will require a comprehensive and effective patient and public engagement strategy with systems and processes to assure the governing body that this is taking place throughout the organisation. They will need to play a full role on their local Health and Wellbeing Boards including co-operating, in preparing joint strategic needs assessments, and agreeing a joint Health and Wellbeing Strategy. They will also **work in partnership with Local Authorities** and (as members of the Health and Wellbeing Boards) have a role in encouraging **health and social care commissioners** with the aim of securing better integrated health and social care for their patients. They will have a responsibility to ensure that **relevant health and care professionals** are involved in the design of services and **that patients and the public** are actively involved in the commissioning arrangements<sup>7</sup> p4 (emphasis added).

This paragraph indicates potential complexities facing CCGs, referring to a number of different audiences and stakeholders. However, it is silent about the mechanics of the various accountability relationships, and provides no advice as to how any conflicts between them might be resolved.

This paper uses evidence from a study of the early development of CCGs to explore how claims to increased accountability might play out in practice. We examine CCG constitutional documents, interviews with CCG leaders and observation of CCG meetings to explore how CCGs are interpreting their accountabilities and how the new system is developing in practice. Although it is early days, and the full effect of the various accountability relationships will not

1  
2  
3  
4  
5  
6  
7  
8  
9 become clear for some time, we believe that it is valuable to highlight developing complexities  
10 and potential issues at this point.

11  
12 What follows is divided into five sections. A short discussion of the relevant dimensions  
13 of ‘accountability’ is followed by a more detailed account of the obligations and roles given to  
14 CCGs under the Health and Social Care Act 2012 <sup>4</sup>. A description of our methods is followed by  
15 results and discussion, with a final section summarising the implications of our findings.  
16  
17  
18  
19

### 20 ***Definitions of accountability***

21  
22 Mulgan <sup>8</sup> describes accountability as a ‘complex and chameleon-like term’ (p555),  
23 ~~describing the extension of the idea that has extended~~ beyond an original concern with being  
24 ‘called to account’ by some legitimate authority, to incorporate a multitude of additional  
25 concepts such as internal notions of personal responsibility and professional accountability to  
26 peers. Ryan and Walsh <sup>9</sup> argue that, driven by the so-called ‘new public management’ approach  
27 <sup>10</sup>, accountability in the public sector is particularly complex, with actors in public sector  
28 organisations being potentially accountable to multiple audiences, including an informed public  
29 as well as to ministers. In order to make sense of this complexity, in this paper we will use  
30 definition suggested by Bovens <sup>11</sup>: ‘[accountability is] a relationship between an actor and a  
31 forum, in which the actor has an obligation to explain his or her conduct, the forum can pose  
32 questions and pass judgement, and the actor may face consequences’. This definition brings into  
33 focus the notion of authority, alongside the potential for judgement and sanctions. However, it  
34 leaves open the currency of accountability: for what aspects of his/her ‘conduct’ must an actor  
35 answer? A number of authors have addressed this question <sup>12-14</sup>. Leat <sup>15</sup> offers a fourfold  
36 classification: fiscal accountability, focusing upon expenditure and financial probity; process  
37 accountability, exploring the adequacy of procedures for decision making; accountability for  
38 priorities, providing justification for the way in which an organisation has focused its activities;  
39  
40  
41  
42  
43  
44  
45  
46  
47  
48  
49  
50  
51  
52  
53  
54

1  
2  
3  
4  
5  
6  
7  
8  
9 and programme accountability, by which an actor is held to account for the outcomes of their  
10 activity. Turning to the question of sanctions, Brinkerhoff<sup>12</sup> sketches the idea of a spectrum,  
11 from accountability as the provision of information about an organisation's actions at one end,  
12 through the additional requirement to justify those actions, to a sanction-backed formal  
13 'answerability', in which different types of sanctions may be enforced in order to ensure  
14 compliance, at the other. This provides a useful lens through which to consider the strength of  
15 any particular accountability relationship.  
16  
17  
18  
19  
20  
21

22 Accountability thus defined encompasses both what Day and Klein<sup>16</sup> call 'managerial  
23 accountability'; that is, accountability as a largely technical process, by which those with  
24 delegated authority are held to account against clearly specified criteria, agreed in advance, and  
25 'political accountability', by which those with delegated authority are answerable for their  
26 actions to the public. In this latter form of accountability, the criteria for judgment are  
27 themselves subject to debate, and it is characterised by reasons, justification and explanations of  
28 behavior (ibid p26), rather than by technical assessment against specified criteria. Such  
29 accountability is rarely backed by any form of sanctions other than the possibility that those  
30 involved might be subject to a democratic process or public opprobrium. In the real world,  
31 simple separation between these two forms of accountability rarely exists,<sup>16</sup> (p28), but the  
32 distinction remains analytically useful, as it provides a framework within which to think about  
33 public accountability, which is rarely tied to specific performance criteria (unlike managerial  
34 accountability). Furthermore, political accountability carries the possibility that moral and ethical  
35 dimensions of performance might be incorporated into the accountability framework.  
36  
37  
38  
39  
40  
41  
42  
43  
44  
45  
46  
47

48 Taking these definitions together, four key questions emerge, [which were addressed in](#)  
49 [this study. These are set out in Box 1.](#)  
50  
51  
52  
53  
54

### Box 1: Key questions about accountability

- To whom are these actors accountable?
- For what are they accountable?
- What sanctions may apply?
- What enforcement mechanisms exist?
- Is this accountability managerial (with clear criteria for judgement) or political (involving justification and argument)?

**Formatted:** Font: (Default) Times New Roman, 12 pt

**Formatted:** Font: (Default) Arial, 10 pt, English (U.K.)

**Formatted:** List Paragraph, Bulleted + Level: 1 + Aligned at: 0.25" + Indent at: 0.5"

**Formatted:** Font: (Default) Times New Roman, 12 pt

**Formatted:** Font: (Default) Arial, 10 pt, English (U.K.)

**Formatted:** Font: (Default) Arial, 10 pt, English (U.K.)

**Formatted:** Font: (Default) Arial, 10 pt, English (U.K.)

~~Firstly, any study of accountability must ask 'to whom are these actors accountable?'~~

~~Secondly, we can ask: 'accountable for what?', exploring the different types of activities and outcomes which might be tested. Thirdly, we need to explore how far particular accountabilities are underpinned by sanctions, and what enforcement mechanisms exist. Finally, following Day and Klein<sup>46</sup>, it is important to distinguish between a managerial accountability, in which the criteria of judgment are relatively clear, and political accountability, in which the key is producing a plausible argument about actions and decisions.~~

### ***The role and functions of Clinical Commissioning Groups***

Since the introduction of the quasi-market into the NHS there has been an ambition to involve front line primary care physicians more closely in purchasing care for their patients. Examples include: GP fundholding, Total Purchasing Pilots, GP Commissioning groups, Primary Care Groups and Practice-based Commissioning<sup>17</sup>. Each of these previous attempts at involving clinicians in commissioning shares one thing: alongside the clinical group there existed an administrative body (initially the Health Authority, latterly the PCT) to take statutory and financial responsibility. Under the HSCA 2012, no such administrative support exists, with

1  
2  
3  
4  
5  
6  
7  
8  
9 CCGs taking on full statutory responsibility from April 2013. From this date, CCGs have been  
10 responsible for planning, agreeing, procuring and monitoring a full range of services for their  
11 populations. The exact distribution of commissioning responsibilities between CCGs and other  
12 new bodies, such as NHS England, is complex, but essentially CCGs are responsible for most  
13 elective, urgent and community care<sup>18</sup>. In addition, they are responsible for improving the  
14 quality of primary care services, and are under a duty to work co-operatively with the LA<sup>19</sup>.  
15  
16 Finally, they are under a duty to break even financially, and carry responsibility for ensuring that  
17 they meet their obligations with regard to safeguarding children and other general duties such as  
18 complying with Equalities legislation  
19

## 20 *Methods*

21 The study took place between September 2011 and June 2012. Data collection involved both in  
22 depth case studies in 8 emerging CCGs<sup>2</sup>, and national web surveys carried out at two points in  
23 time (December 2011 and April 2012). In this paper we focus upon the results from the  
24 qualitative case studies. For a full description of the methods see Checkland et al<sup>20</sup>  
25

26 The 8 case study sites were selected to provide maximum variety across a number of  
27 characteristics, including: size; the homogeneity of the socio-demographic profile of the site; and  
28 the complexity of the local health economy and local government institutions.  
29  
30  
31  
32  
33  
34  
35  
36  
37  
38  
39  
40  
41  
42  
43  
44  
45  
46  
47  
48  
49

---

50 <sup>2</sup> CCGs are not formally established until they have been through the authorisation process. At the time of this  
51 research, CCGs were technically sub-committees of their local PCT, and should properly be referred to as  
52 emerging', 'aspirant' or 'Pathfinder' CCGs. However, in order to make the paper more readable, the term  
53 'emerging' is omitted, using the shorthand of 'CCG' to refer to the groups putting themselves forward for  
54 authorisation.



Table 1: Site characteristics

| Site   | Size (quintile) | Socio-demographic profile <a href="#">and area</a>                             | Major providers | Local Authorities |
|--------|-----------------|--------------------------------------------------------------------------------|-----------------|-------------------|
| Site 1 | 3               | Mixed, <a href="#">north</a>                                                   | 1               | >1                |
| Site 2 | 5               | Relatively homogeneous, pockets of deprivation, <a href="#">north</a>          | > 1             | 1                 |
| Site 3 | 5               | Relatively homogeneous, affluent, pockets of deprivation <a href="#">south</a> | > 1             | >1                |
| Site 4 | 2               | Relatively homogeneous, deprived, <a href="#">north east</a>                   | > 1             | 1                 |
| Site 5 | 3               | Relatively homogeneous, deprived, <a href="#">midlands</a>                     | 1               | >1                |
| Site 6 | 2               | Relatively homogeneous, affluent, <a href="#">south</a>                        | 1               | 1                 |
| Site 7 | 4               | Mixed, <a href="#">south</a>                                                   | > 1             | 1                 |
| Site 8 | 4               | Mixed, <a href="#">northwest</a>                                               | 1               | 1                 |

Formatted Table

The smallest sites covered a population of 88,000-138,000, whilst the largest were responsible for a population of >500,000. Data collection involved observation of a wide variety of different types of meetings, semi-structured interviews and analysis of available documents such as meeting minutes, strategy plans and draft constitutions. In total we observed 439 hours of meetings and carried out 96 interviews (see table 2). Meetings included, for example, CCG Governing Body meetings, working group meetings, and meetings of the local Health and Wellbeing Board.

1  
2  
3  
4  
5  
6  
7  
8  
9  
10  
11  
12  
13  
14  
15  
16  
17  
18  
19  
20  
21  
22  
23  
24  
25  
26  
27  
28  
29  
30  
31  
32  
33  
34  
35  
36  
37  
38  
39  
40  
41  
42  
43  
44  
45  
46  
47  
48  
49  
50  
51  
52  
53  
54  
55  
56  
57  
58  
59  
60

Table 2: Interviews

| Type of respondent              | Number interviewed | Number of interviews (some interviewed twice) |
|---------------------------------|--------------------|-----------------------------------------------|
| Managers (NHS)                  | 47                 | 49                                            |
| GPs                             | 33                 | 36                                            |
| Lay members                     | 5                  | 5                                             |
| Practice Managers               | 3                  | 3                                             |
| Nurse (Clinical lead)           | 1                  | 1                                             |
| Others (eg Trust manager)       | 1                  | 1                                             |
| Local Authority Representatives | 1                  | 1                                             |
| <b>Total</b>                    | <b>91</b>          | <b>96</b>                                     |

Interviews were recorded and transcribed, and detailed contemporaneous fieldnotes were written in meetings. These data sources were analysed alongside available documents (including those produced locally and guidance issued by the Department of Health/NHSCB) [using supported by](#) the qualitative data analysis software Atlas ti. We also examined available constitutional documents for our case study sites.

For this paper, the analysis focused upon the ways in which ideas of accountability surfaced in all of the data sources, looking to answer the following questions:

- To whom are developing CCGs formally accountable, and to whom do they regard themselves as being accountable?
- For what aspects of their performance do they expect to provide an account to each stakeholder?
- What sanctions might apply?
- What (if any) potential conflicts or problems can be identified in the new system?

## Results and discussion

In the following section, the results from the study will be presented. We identified two main forms of accountability relationships of concern to the groups: accountability to external groups; and internal accountability.

### External Accountability

Relationship with ~~the NHS Commissioning Board (later renamed 'NHS England')~~ [NHS England](#)  
~~The NHSCB~~ [NHS England](#) provided a 'model constitution framework'<sup>21</sup>, which CCGs were encouraged to adapt for their own purposes. This makes it clear that CCGs are formally accountable to ~~the NHSCB~~ [NHS England](#) and, ~~through the NHSCB mandate~~<sup>22</sup>; to the Secretary of State for Health<sup>22</sup>:

- 5.4.1. The group will
- comply with all relevant regulations;
  - comply with directions issued by the Secretary of State for Health or the NHS Commissioning Board; and
  - take account, as appropriate, of documents issued by the NHS Commissioning Board [\[NHS England\]](#).<sup>21</sup>

The 'regulations' referred to are pieces of secondary legislation. The potential accountabilities here are both broad and as yet undefined. In addition to general duties (such as a duty to promote integration, a duty to involve the public) first set out in earlier documents<sup>18</sup>, the model constitution sets out some specific financial duties, including: the need to maintain expenditure within agreed limits; the duty to 'take account' of directions issued by ~~the NHSCB~~ [NHS England](#); and the requirement to 'publish an account' of how additional payments had been spent<sup>21</sup> para 5.3).

As well as this essentially fiscal accountability, CCGs are also accountable for outcomes, set out in the form of a new 'Clinical Commissioning Group Outcomes indicator set' (CCGOIS). This was first mooted in the White paper, 'Equity and Excellence: Liberating the NHS':

1  
2  
3  
4  
5  
6  
7  
8  
9 A new NHS Outcomes Framework will provide direction for the NHS. It will  
10 include a focused set of national outcome goals determined by the Secretary of  
11 State, against which the NHS Commissioning Board [NHS England](#) will be held  
12 to account, alongside overall improvements in the NHS. In turn, the NHS  
13 Outcomes Framework will be translated into a commissioning outcomes  
14 framework for GP consortia, to create powerful incentives for effective  
15 commissioning. <sup>1</sup> p22)

16  
17 The indicators that have been published so far vary in scope, from those focused upon reducing  
18 mortality to those requiring the provision of particular services, such as ensuring patients with a  
19 stroke have a visit from a specialist nurse (<http://www.nice.org.uk/aboutnice/cof/cof.jsp>).  
20  
21

22  
23 Guidance issued in December 2012 <sup>23</sup> suggests that, in addition to a payment for meeting target  
24 thresholds on these indicators, what Leat <sup>15</sup> calls ‘programme accountability’ for these outcomes  
25 will form part of ~~the~~ [NHSCB's NHS England's](#) overall annual assessment of CCG performance.  
26  
27

28  
29 The first hurdle for CCGs to pass was the requirement to be ‘authorised’ by ~~the~~  
30 [NHSCB-NHS England](#). This process involved the submission by CCGs of evidence under six  
31 ‘domains’ relating to a strong clinical and professional focus, patient and public engagement,  
32 good governance arrangements, collaboration and good leadership. Those CCGs not deemed  
33 ready for full authorisation were initially ‘authorised with conditions’. Whilst public comments  
34 by the ~~then~~ Secretary of State for Health Andrew Lansley initially implied that such conditions  
35 would be minimal or rare <sup>24</sup>, in practice, only 43 out of 211 CCGs achieved authorisation without  
36 conditions, 158 had conditions imposed and 10 had significant conditions backed by legal  
37 directions.  
38  
39

40  
41  
42  
43  
44  
45  
46 Once authorised, the guidance states:

47  
48 **Annual assessment:** once authorised (with or without conditions), each CCG is  
49 subject to an annual assessment. This will consider how well a CCG has  
50 performed its functions in that year, and as part of that assessment, determine the  
51 nature of support or conditions going forward, based on its performance and other  
52 aspects of its organisational capabilities and relationships, and will enable the  
53 continued development of CCGs. <sup>25</sup> p11  
54  
55  
56  
57  
58  
59  
60

1  
2  
3  
4  
5  
6  
7  
8  
9  
10  
11 The requirements against which this ‘assessment’ will be made have not yet been set out,  
12 although it seems likely that the CCGOIS will be involved.<sup>26</sup>

13  
14 It is thus clear that CCGs will be held accountable by [the NHSCBNHS England](#), and that  
15 this will be backed up by sanctions, including loss of ability to function as an autonomous  
16 statutory body, and loss of income (the ‘quality premium’ will be tied to performance against the  
17 CCGOIS). The accountability implied here is a managerial one, backed up by explicit  
18 performance measures.  
19

20  
21 We found that this significant formal (and sanction-backed) accountability to [the](#)  
22 [NHSCBNHS England](#) was recognised in the draft constitutions under development in our case  
23 study sites, with most carrying unchanged the language provided by the model documents.  
24 However, those involved with setting up CCGs in our case study sites did not seem to have  
25 appreciated either the extent of these obligations or their potential impact. Indeed, across 439  
26 hours of observation and 96 interviews, there were only three references to ‘being held to  
27 account’ by [the NHSCBNHS England](#), and ‘accountability’ of all sorts was hardly mentioned  
28 [either in the meetings which we observed](#). –Furthermore, although it was known that there would  
29 be an ‘outcomes framework’, this was also rarely mentioned. It may be that this was in part a  
30 function of the timing of our data collection, which took place before [the NHSCBNHS England](#)  
31 was formally constituted and before the draft CCGOIS was published. However, it still seems  
32 worthy of remark that the discourse within our case study CCGs showed little apparent  
33 recognition of the extent of the external accountability regime to which they will be subject.  
34  
35 When accountability to the wider NHS was discussed, the most common type of accountability  
36 mentioned was fiscal accountability. Furthermore, in response to an open-ended question in our  
37 second web-based survey (followed up in subsequent telephone interviews) about their ongoing  
38  
39  
40  
41  
42  
43  
44  
45  
46  
47  
48  
49  
50  
51  
52  
53

1  
2  
3  
4  
5  
6  
7  
8  
9  
10  
11  
12  
13  
14  
15  
16  
17  
18  
19  
20  
21  
22  
23  
24  
25  
26  
27  
28  
29  
30  
31  
32  
33  
34  
35  
36  
37  
38  
39  
40  
41  
42  
43  
44  
45  
46  
47  
48  
49  
50  
51  
52  
53  
54  
55  
56  
57  
58  
59  
60

relationship with [the NHSCBNHS England](#), by far the largest category of responses were those calling for [the NHSCBNHS England](#) to give CCGs freedom, imposing few burdens such as reporting requirements, targets or other forms of performance management.

#### Accountability to the public

Clause 4.5 of the model draft constitution provided by [the NHSCBNHS England](#) is headed 'Accountability'. It appears to construe this largely in the relatively weak sense of transparency, listing a series of mechanisms the CCG will use to 'demonstrate accountability':

- 4.5.1. The group will demonstrate its accountability to its members, local people, stakeholders and the NHS Commissioning Board ([NHS England](#)) in a number of ways, including by:
- a) publishing its constitution;
  - b) appointing independent lay members and non GP clinicians to the group's governing body;
  - c) holding meetings of the group's governing body in public (except where the group considers that it would not be in the public interest in relation to all or part of a meeting);
  - d) publishing annually a commissioning plan;
  - e) complying with local authority health overview and scrutiny requirements;
  - f) meeting annually in public to publish and present its annual report;
  - g) producing annual accounts in respect of each financial year which must be externally audited;
  - h) having a published and clear complaints process;
  - i) complying with the Freedom of Information Act 2000;
  - j) providing information to ~~the NHS Commissioning Board~~[NHS England](#) as required;
  - k) publishing the group's principal commissioning and operational policies.

Most of our case study CCGs adopted this clause as it stands for their constitutions, although two sites omitted clause k.

In contrast to their relative silence about their future relationship with [the NHSCBNHS England](#), our case study CCGs appeared keenly aware of the need to be accountable to their patients and the public. This GP expressed this clearly:

I think what we haven't done yet and what we're trying to organise now ... is go one step further and recognise that we are after all accountable to the public, we're

1  
2  
3  
4  
5  
6  
7  
8  
9 there to serve them, we are paid by them, we're there to provide their health needs  
10 [GP ID 200]

11  
12 The same GP went on to describe a pilot programme to engage local people in discussions about  
13 service developments, arguing that setting up robust mechanisms would in some way protect  
14 them against the centralising tendencies of [the NHSCB/NHS England](#):  
15

16  
17  
18 'that will give true public accountability to the CCGs and Health and Wellbeing  
19 Boards and I think it will be very hard for agencies like [the NHSCB-\[NHS](#)  
20 [England\]](#) to argue against it if the public back it. So I think that counteracts the  
21 fear of centralisation in the new reforms. [GP ID 200]  
22

23  
24 Mechanisms for ensuring accountability to the public were in the early stages of development at  
25 the time of our data collection. Holding meetings in public was seen as important, but there were  
26 some concerns. One site had set up these meetings with the opportunity for the public to ask  
27 questions only at the beginning of the meeting, rather than at the end when they might have been  
28 able to respond to what they had heard. In an interview we were told:  
29  
30  
31  
32

33  
34 I don't know why they've set it up this way to be honest. I haven't been involved  
35 in that, so I don't know what the rationale is. I've got a feeling that was how the  
36 PCT used to operate, but I might be wrong. I mean I think if we're trying to  
37 engage with our public, but only allow them to speak at the beginning, before  
38 we've actually said anything...it does rather go against the ethos, I think  
39 [Manager ID 122]  
40

41 There was a general awareness that meeting in public alone will not ensure true public  
42 accountability, and all of our study site CCGs were intending to set up additional forums for  
43 patients and the public to become involved with the work of the CCG, including patient forums,  
44 community involvement groups, public events and the publication of newsletters. They thus  
45 showed a significant rhetorical commitment to the essentially political accountability represented  
46 by so-called 'public accountability', but, at the time of data collection, arrangements to put this  
47  
48  
49  
50  
51  
52  
53  
54  
55  
56  
57  
58  
59  
60

1  
2  
3  
4  
5  
6  
7  
8  
9 in practice were rudimentary and did not yet differ significantly than those set up by their  
10 predecessor organisations, PCTs

11  
12 CCGs are also required to have at least two Lay members on their Governing Body<sup>27</sup>. In  
13 practice, those appointed as 'Lay' members in our case study sites tended to be people with past  
14 NHS experience, with ex-Non-executive Directors of PCTs a popular choice. PCTs were  
15 required to have a majority of Non-executive directors, so that the executive directors could be  
16 out-voted if necessary. This will not be the case in CCGs, suggesting that, on paper at least, the  
17 'public' voice within CCGs' governing bodies will be less powerful than it has been in past NHS  
18 commissioning bodies. [We saw no clear differences in attitude or approach between lay and  
19 professional members of Governing Bodies.](#)  
20  
21  
22  
23  
24  
25  
26  
27

28 In addition to these CCG-led approaches to public accountability, the HSCA 2012  
29 establishes new bodies called Local Healthwatch<sup>1</sup>. These organisations did not exist at the time  
30 of our data collection, but official documents suggest that they will be expected to scrutinise  
31 CCGs' performance and hold them to account in some way, although the mechanisms by which  
32 this will take place are far from clear.  
33  
34  
35  
36

### 37 Other external accountabilities

38  
39 CCGs also have some external accountability to other organisations. These include the  
40 economic regulator, Monitor (responsible for ensuring that CCGs adhere to competition rules);  
41 Health and Well-being Boards (HWB); local LA Overview and Scrutiny Committee (OSC); and  
42 the Local Medical Committee (LMC). The LMC is the local representative body for GPs.  
43  
44  
45  
46  
47  
48  
49  
50  
51  
52  
53  
54  
55  
56  
57  
58  
59  
60

#### *Monitor*



1  
2  
3  
4  
5  
6  
7  
8  
9 Under the HSCA 2012, Monitor is the economic regulator of the whole NHS system,  
10 including promoting competition between providers of care. It is empowered to require CCGs to  
11 account for their behavior with respect to procurement, and this accountability will be formally  
12 backed up by the sanctions of competition law. At the same time, Monitor is required to promote  
13 integration and co-operation between providers of health services (HSCA 2012 section 66). It  
14 remains to be seen how these apparently conflicting responsibilities will play out. At the time of  
15 our fieldwork, the future role of Monitor impinged little on our case study sites. This is not  
16 surprising, as at this time, the details of how Monitor's future role will operate are not yet fully  
17 developed at national level.  
18  
19

#### 20 21 22 23 24 25 26 *Accountability relationships with the Local Authority (LA)*

27  
28 Health and Wellbeing Boards are new LA bodies which are responsible for setting the  
29 strategic direction for health and social care, leading the formal assessment of local needs. These  
30 are in differing states of development across the country, and at the time of data collection it was  
31 unclear how the mutual 'holding to account' between HWBs and CCGs would operate in future.  
32 HWBs are responsible for developing the annual Joint Strategic Needs Assessment (JSNA), and  
33 CCGs are required to 'take account' of this in developing their own strategic plans. CCGs have  
34 representatives on their local HWB, and will therefore be party to the JSNA development.  
35 Should the HWB consider that the CCGs plans do not fit within it, they will be able to ask the  
36 CCG to 'provide an account' to explain why this is the case. However, no sanctions exist should  
37 the CCG continue to disregard the HWB. Whilst it remains early days, our study found evidence  
38 of two approaches to this developing relationship<sup>28</sup>. In some sites, the CCGs appeared to see  
39 themselves as an integral and important part of the development of the HWB, seeing themselves  
40 as 'co-owners' of the HWB with the Local Authority. In other areas, we saw HWBs developing  
41 separately, with the CCG representatives present at meetings but apparently seeing themselves as  
42  
43  
44  
45  
46  
47  
48  
49  
50  
51  
52  
53

1  
2  
3  
4  
5  
6  
7  
8  
9 representing the CCG rather than as partners in the HWB process. It remains to be seen how  
10 these differing approaches develop over time, and how HWBs will react should CCGs decide to  
11 disregard their concerns.  
12

13  
14 The other key LA accountability mechanism is via the Overview and Scrutiny (O&S)  
15 process. Historically, O&S Committees (OSCs) were empowered to examine any ‘significant’  
16 changes to local services, requiring relevant NHS senior managers to attend and explain their  
17 plans. Should the committee be unconvinced, they had the power to refer the proposed change to  
18 the Secretary of State for Health. It was initially proposed that this scrutiny function would be  
19 assumed by HWBs, but after some debate, it was decided that LAs should retain it as a separate  
20 function<sup>29</sup>. However, considerable uncertainties remain as to how this will function in practice  
21  
22  
23  
24  
25  
26  
27  
28  
29  
30  
31  
32  
33  
34  
35  
36  
37  
38  
39  
40  
41  
42  
43  
44  
45  
46  
47  
48  
49  
50  
51  
52  
53  
54  
55  
56  
57  
58  
59  
60

19. Given the early stages of development of the new structures, it is not surprising that the majority of respondents in our case study sites were as yet little concerned with their obligations to account for themselves before the local OSC. This manager expressed some skepticism:

To be honest with you, I didn’t really understand why we were held to account by the OSC because... especially if they don’t understand the area of work that we’re talking about. If you go in and talk about diagnostics and how we’re going to reconfigure that in the health economy, really, they wouldn’t really know what... so I think it’s... I think it’s useful for some things, the joint initiatives like... like the stability, transport and all those sort of things that kind of have a cross-cutting effect, but I’m not really sure that it’s useful for the specific health issues.  
[manager ID 152]

Others were more positive, describing the O&S process as ‘helpful’ in the past in refining and developing plans.

#### *Local Medical Committees*

Finally, many of our CCGs were keen to include their Local Medical Committee in discussions of their development plans. LMCs have no formal role in CCG development, but those we studied were aware that to antagonise the LMC could carry significant consequences in

1  
2  
3  
4  
5  
6  
7  
8  
9 terms of member engagement. Many utilised the LMC to organise the elections to their board,  
10 and continued to liaise and consult with the group. In one site we witnessed a long discussion  
11 about the future relationship between the CCG and the local LMC. The LMC had requested  
12 regular formal meetings with the CCG Governing Body, but the CCG resisted this, agreeing that  
13 they should engage, but suggesting that frequent meetings would be unnecessarily burdensome.  
14  
15 The CCG lay member commented: 'now you [as GPs] are directly responsible, you are the  
16 accountable body and the LMC have no role to hold you to account'. Another group included  
17 this clause in their constitution:  
18  
19  
20  
21  
22  
23

#### 24 The LMC

25 3.6.1 The CCG recognises [local] Local Medical Committee as the statutory  
26 representative body of general practice for provider purposes in relation to local  
27 primary care contracts. There will also be full observer status for the LMC on the  
28 CCG Governing Body and the Chair of the CCG will regularly attend meetings of  
29 the LMC by invitation to provide updates, briefings and respond to individual  
30 areas of concern. Other opportunities for engagement (such as Locality Link  
31 Members) will be set out in the member practice engagement strategy. The LMC  
32 also plays an important role in independently running the election process for  
33 Locality GP representation.  
34

#### 35 *Overlapping accountabilities*

36  
37 It is thus clear that CCGs are subject to a wide range of external accountabilities. The most  
38 clearly developed of these is the [sanction-backed](#) accountability to ~~the~~ NHS England, but it is  
39 also clear that a wide range of other bodies feel that they have a role. The extent of these external  
40 accountabilities was experienced as problematic at times, with one manager commenting:  
41  
42  
43  
44

45 ...there's people in the rest of the NHS are trying to work out what their roles are.  
46 You know, I have had four demands this week from different places for a slightly  
47 different perspective report on the same topic, and not just a report but then turn  
48 up and tell them and assure them you're doing something about it. And that's just  
49 on the one topic. That's the world we're living in. And while you're satisfying that  
50 world, it's very difficult to focus on what your organisation should be doing.  
51 [manger ID 173]  
52  
53  
54  
55  
56  
57  
58  
59  
60

### Internal accountability

CCGs are membership organisations, and this is said to be one of the key strengths of the new structures<sup>30</sup>. As such, there is a two-way accountability relationship between the CCG Governing Body and the [General Practices practices](#) who are members, as well as accountabilities between the various working groups within the CCG.

#### Members' accountability to the CCG

The CCGs in our study were clear that their practice members would be in an accountability relationship with the CCG, and this relationship was one in which the CCG would 'hold [practices-General Practices](#) to account' for their behaviour, including such things as referral practices and prescribing. This manager described it thus:

Q: What would you claim to be the early success of a CCG? I mean you, how would you see it?

A: That's a very good question [laughter]. I think... one of things it has done is it has got more GPs involved and more GPs talking to one another and looking at their referral patterns and realising that ... they are accountable rather than it maybe just being one person for a practice being the person who goes to this meeting, comes back and everybody goes oh, well that's fine and just ignores it. I think there is certainly an additional...almost accountability, a buy in from more GPs across the patch. [Manager ID 254]

In many sites the relationship between [practices-General Practices](#) and the wider group is governed by a written agreement, called an 'accountability' or 'membership' agreement:

If you're working as a CCG and you've... signed up to your accountability agreement and everyone's in it together, you can't have some [practices-General Practices](#) overspending ridiculously and some desperately trying to make savings. You know, that's not... I don't think that's on. [GP ID 37]

These agreements were usually developed in addition to the CCG constitution, and set out mutual obligations within the group. Thus, for example, in Site 3 the 'membership agreement'

1  
2  
3  
4  
5  
6  
7  
8  
9 forms an appendix to the formal constitution of the group. It sets out what the CCG will provide  
10 for [General Practicespractices](#) (such as the provision of timely information, educational events  
11 and prescribing support) and stipulates the following practice obligations:  
12  
13

- 14 • To share named information by practice for peer review
- 15 • To actively participate in demand management using specified tools
- 16 • To actively communicate with other members, the locality and the CCG as a whole
- 17 • To develop a framework for quality within the practice
- 18 • To agree and sign up to the terms of the Constitution.
- 19 • If any member practice fails to meet agreed targets, they agree to work on and implement  
20 a development plan.
- 21 • To provide a practice patient representative for the patient and public engagement body
- 22 • To name a practice lead for Clinical Commissioning
- 23 • To work on and implement care closer to home pathways
- 24 • To actively manage the devolved budget to assist financial balance and QIPP
- 25 • To support robust and effective clinical, financial and operational risk management  
26 across the CCG [Extract from Membership agreement Site 3]
- 27
- 28
- 29
- 30
- 31
- 32
- 33
- 34
- 35
- 36
- 37
- 38

39 Such agreements suggest a degree of voluntarism, by which [General Practicespractices](#) are  
40 ceding some sovereignty to the wider group, in return for receiving support and access to the  
41 resources of the group. However, CCG membership is compulsory for all [General](#)  
42 [Practicespractices](#) in England, so this voluntarism is in practice somewhat illusory:  
43  
44  
45  
46

47 A membership agreement had been drawn up (see associated documents). This  
48 has to be signed by all GPs. [GP lead] asked how best to go about this. He also  
49 pointed out that this agreement is not a legally binding document. After some  
50 discussion it was agreed to send out the document to practice managers and ask  
51 them to oversee the process and [manager] was asked to follow up those that did  
52 not return the signed agreement. [participant] asked if they should plan for those  
53

1  
2  
3  
4  
5  
6  
7  
8  
9 who refuse to sign. [GP lead] said: there is no choice! [Extract from fieldnotes,  
10 Locality meeting ID M54]  
11

12 It also remains unclear what sanctions might apply, should [General Practicespractices](#) break the  
13 terms of these agreements. One CCG constitution suggests that [General Practicespractices](#) failing  
14 to keep to the agreement would have to 'give an account' firstly to their local peers, and  
15 subsequently to the CCG board, but no sanctions and timescales are specified. Such agreements  
16 must walk a fine line, as performance management of GPs with respect to their clinical practice  
17 will be the responsibility of NHSE, and there has been national concern to ensure that CCGs do  
18 not stray into this aspect of practice <sup>31</sup>.  
19

#### 20 Accountability to members

21 The formal accountability of the CCG to its constituent members is mainly promulgated  
22 through the accountability of its governing body to the members; and of the specific officers of  
23 the CCG (being the Chair, Accountable Officer (AO) and Chief Financial Officer (CFO)) to the  
24 CCG. One aspect of accountability is the ability to dismiss those who do not perform well. The  
25 general principle for CCGs is that members elect their governing body and chair for time limited  
26 terms. But the model constitution does not specify exactly how the governing body, officers and  
27 committees should be elected and dismissed, and there is some variation in how this has been  
28 arranged in the constitutions adopted in the study sites. The governing body is accountable to the  
29 members for the running of the CCG in accordance with its constitution. Clause 7.3.1. of the  
30 model constitution explains how  
31

32 'each member of the governing body should share responsibility as part of a team  
33 to ensure that the group exercises its functions effectively, efficiently and  
34 economically, with good governance and in accordance with the terms of this  
35 constitution'  
36  
37  
38  
39  
40  
41  
42  
43  
44  
45

1  
2  
3  
4  
5  
6  
7  
8  
9 The officers of the CCG are also accountable to the governing body of the CCG, and through  
10 that to the CCG membership. Each CCG's draft constitution sets out its own requirements for  
11 appointment and removal. For example, the chair in one site must be a 'provider of primary  
12 medical services' who is elected by 'qualifying providers of primary medical services'. There is  
13 a two to four year term, renewable to a maximum of ten years. Some of the constitutions state  
14 circumstances in which the chair would be obliged to stand down, for example in another site, if  
15 the chair  
16  
17  
18  
19  
20  
21

22 'has behaved in a manner or exhibited conduct which has or is likely to be  
23 detrimental to the reputation and interest of the group and is likely to bring the  
24 group into disrepute. This includes but is not limited to dishonesty,  
25 misrepresentation (either knowingly or fraudulently), defamation of any member  
26 of the governing body, abuse of position, non declaration of a known conflict of  
27 interest, seeking to lead or manipulate a decision of the governing body in a  
28 manner that would ultimately be in favour of that person whether financially or  
29 otherwise;'  
30

31 As might be expected as CCGs were in the process of establishing themselves, we witnessed  
32 considerable discussion about these internal governance issues within the groups. In meetings  
33 and in interviews comments were made about the following accountabilities:  
34  
35  
36

- 37 • The CCG Governing Body is accountable to the members
- 38 • Locality groups are accountable to the Governing Body
- 39 • Sub-committees are accountable to the Governing Body
- 40 • Employed officers are accountable to the Governing Body
- 41 • Elected Governing Body members are accountable to the membership

42 However, such discussions rarely included any mention of either the mechanisms by which  
43 such accountabilities would be promulgated, or the sanctions that might apply. In practice, our  
44 findings suggest that the main mechanism by which these accountabilities will be enforced is by  
45 information sharing and transparency, with Governing Bodies receiving reports from sub groups  
46  
47  
48  
49  
50  
51  
52  
53

1  
2  
3  
4  
5  
6  
7  
8  
9  
10  
11  
12  
13  
14  
15  
16  
17  
18  
19  
20  
21  
22  
23  
24  
25  
26  
27  
28  
29  
30  
31  
32  
33  
34  
35  
36  
37  
38  
39  
40  
41  
42  
43  
44  
45  
46  
47  
48  
49  
50  
51  
52  
53  
54  
55  
56  
57  
58  
59  
60

and Localities, and in turn reporting on their activities to assemblies of members. This would seem to be a form of *political* accountability, with the respective groups making an argument and providing justifications for their actions, with no explicit performance measures and few available sanctions. The only area in which there would seem to be some possible formal sanctions is in the election/selection of officers such as Chair and AO, as discussed above. It is also conceivable that a CCG Governing Body which had lost the confidence of its membership might find that [General Practicespractiees](#) informally withdrew their co-operation; whether the Governing Body could use its authority to prevent this is unclear.

### **Summary**

Our study shows that CCGs are subject to a complex web of accountability relationships. The strongest form of accountability would seem to be their accountability to NHS England ([NHSCB](#)), backed by sanctions and subject to annual assessment. Furthermore, the currency of this accountability is clearly established, encompassing fiscal accountability and programme accountability for the [CCGOGIS](#). The accountability to other external bodies such as HWB is, by contrast, much weaker, and less clearly defined, with CCGs required to ‘give an account’, with no associated sanctions. Accountability to Monitor may be more formal, as it would seem that Monitor will be empowered to enforce competition law, although how this will operate in practice is as yet unclear. Accountability to the public is a political accountability, focused upon the relatively weak notion of ‘transparency’, with no associated sanctions. Internal accountability is similarly complex, with a mix of mutual and one way relationships, some accompanied by the ultimate sanction of voting out office holders. [General PracticesPractiees](#) are said to be ‘held to account’ if they transgress the rules of the group, but it is unclear as yet if they could be ejected, as all [General Practicespractiees](#) must be a member of a CCG. These external accountabilities can be summarised in diagrammatic form:



Figure 2: CCG external accountabilities

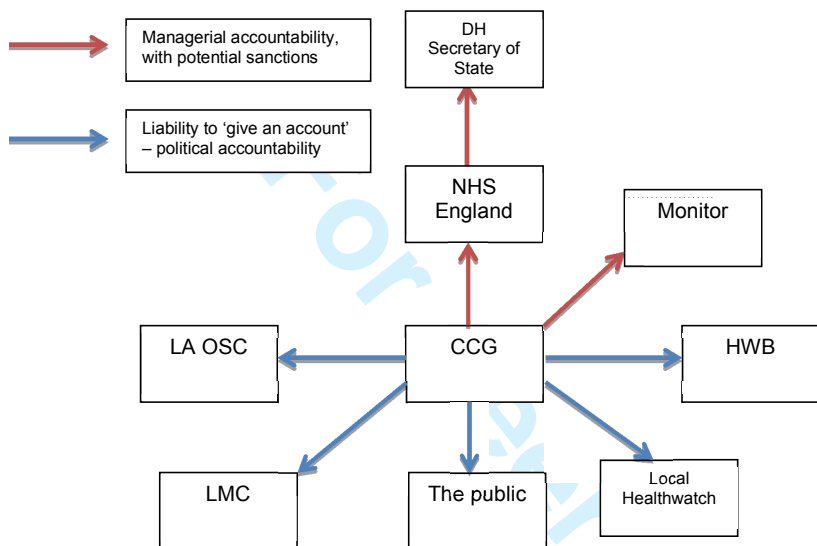

Internal accountability relationships are similarly complex. Figure 3 summarises these, distinguishing between those bodies within CCGs which will hold each other to account, and those which are accountable:

Figure 3: CCG internal accountabilities

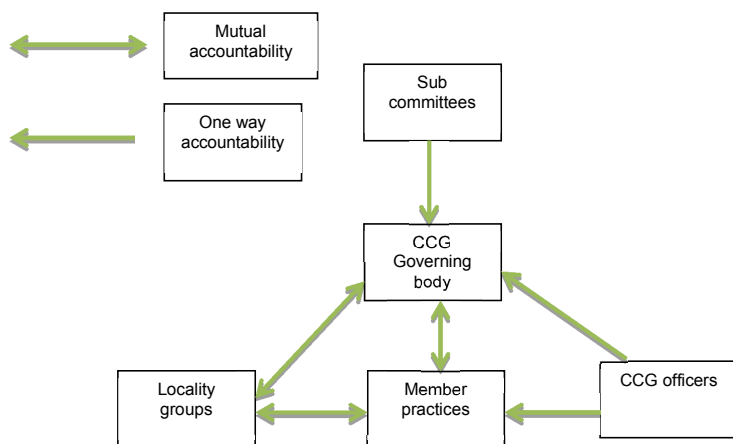

1  
2  
3  
4  
5  
6  
7  
8  
9  
10  
11  
12  
13  
14  
15  
16  
17  
18  
19  
20  
21  
22  
23  
24  
25  
26  
27  
28  
29  
30  
31  
32  
33  
34  
35  
36  
37  
38  
39  
40  
41  
42  
43  
44  
45  
46  
47  
48  
49  
50  
51  
52  
53  
54  
55  
56  
57  
58  
59  
60

## ***Discussion***

### **Principal findings and their implications**

The Health and Social Care Act 2012 promised ‘increased accountability’ as justification for the wide ranging NHS reforms in England. Our study suggests that CCGs will indeed be ‘more accountable’ than their predecessor organisations (Primary Care Trusts) in the sense that they will be accountable to a much wider range of organisations and bodies of people. Indeed, we have shown that CCGs are at the centre of a complex web of accountability relationships, both internal and external. However, whether this translates into being more responsive, or more easily held to account, remains to be seen.

In general, studies suggest that complex accountability arrangements tend to generate confusion<sup>32</sup>, and that, where organisations are accountable to multiple audiences, the interests of those audiences may differ, generating unintended consequences<sup>33</sup>. This may be important for CCGs, as they attempt to balance the demands of the multiple audiences to whom they are being asked to account. We have shown that, as things stand, the accountability relationship with NHS England is the only one in which the currency and focus of accountability is clearly set out, although even this managerial accountability remains untested. However, our study participants also showed a keen commitment to other, more political forms of accountability, and it is possible that in future, CCGs will choose to satisfy their public audiences rather than NHS England or the Department of Health. Thus, for example, NHS England has suggested that CCGs’ closeness to their members and their responsibility to account to local politicians via HWBs will make it easier to make difficult decisions about service reconfigurations<sup>34</sup> but it is equally likely that CCGs accountable to local politicians and to local people via daily contacts in

1  
2  
3  
4  
5  
6  
7  
8  
9 their surgeries will avoid such hard decisions in the face of public opposition. [This latter](#)  
10 [interpretation is perhaps supported by evidence from other fields where such direct local](#)  
11 [accountability exists. Thus, for example, the introduction of directly elected Police and Crime](#)  
12 [Commissioners in the UK raised fears that the need to satisfy a local electorate may lead to a](#)  
13 [short term focus on retaining popularity, rather than a longer term focus on strategic needs](#)<sup>35</sup>  
14

### 15 16 17 18 **Strengths and weaknesses**

19  
20 This study took place during the early phases of CCG establishment, and therefore provides a  
21  
22 snap shot of a developing situation. However, the data collected were wide and deep, and the  
23  
24 findings therefore provide a robust picture of the developing landscape of CCG accountability.  
25

### 26 **Comparison with previous studies**

27  
28 It is instructive to compare CCGs with their predecessor organisations, Primary Care Trusts  
29  
30 (PCTs). PCTs were straightforwardly accountable (via a managerial accountability regime,  
31  
32 backed by the sanction that senior individuals could lose their jobs) to their local Strategic Health  
33  
34 Authority, who were, in turn, accountable to the Secretary of State. In addition, they had a duty  
35  
36 to account to patients and the public, consulting them and providing information about their  
37  
38 decisions. In practice, the strong accountability backed by personal sanctions for the senior  
39  
40 executives drove the agenda, with studies highlighting the clear distinction between ‘must do’  
41  
42 actions where one’s job could be at risk, versus those which could be negotiated or modified <sup>35,36</sup>

43  
44 The potential distorting effect of this type of strong accountability has been well documented  
45  
46 <sup>36,37</sup>, and PCTs were generally held to be poorly accountable to their local populations<sup>38</sup>. Senior  
47  
48 staff in CCGs do not appear at present to be subject to personal sanctions in quite such an  
49  
50 immediate way, and it will be interesting to explore over the coming months whether the threat  
51  
52 of organisational sanctions will act to drive the agenda in a similar way. [It also remains to be](#)

1  
2  
3  
4  
5  
6  
7  
8  
9  
10  
11  
12  
13  
14  
15  
16  
17  
18  
19  
20  
21  
22  
23  
24  
25  
26  
27  
28  
29  
30  
31  
32  
33  
34  
35  
36  
37  
38  
39  
40  
41  
42  
43  
44  
45  
46  
47  
48  
49  
50  
51  
52  
53  
54  
55  
56  
57  
58  
59  
60

[seen how far the early rhetorical commitment to public accountability that we found translates into meaningful activity.](#)

It is too early for there to be any published empirical study of CCG accountability, although some commentaries have been published. In the most comprehensive of these, writing from a legal perspective, Davies<sup>37-39</sup> argues that the complex additional accountabilities to which CCGs are subject may, in practice, act to dilute the important central accountability to Parliament that the Act is ostensibly designed to promote.

#### **Unanswered questions**

CCGs are responsible for significant amounts of public money, and it is important that they are subject to scrutiny as they develop their new ways of working. This study provides an early look their developing accountability relationships, and highlights the complexity and potential problems which may arise. It is vital that further work follows these finding up and explores in depth the way in which the complex relationships identified here play out in practice over time. Ultimately, the extent to which CCGs are felt to be truly accountable for their work will be an important aspect of any overall judgment about the success of this significant reform programme.

#### **References**

1. Department of Health. Equity and Excellence: liberating the NHS. London: The Stationary Office, 2010.
2. Cabinet Office. The Coalition: our programme for government. Freedom, fairness, responsibility. London: Cabinet Office, 2010.
3. Flynn R, Williams G, editors. *Contracting for health: quasi-markets and the NHS*. Oxford: Oxford university Press, 1997.
4. Health and Social Care Act. Department of Health, 2012.
5. NHS Commissioning Board. Developing commissioning support: Towards service excellence, 2012.
6. Department of Health. A short guide to NHS Foundation Trusts. London: The Stationary Office, 2005.
7. NHS Commissioning Board. Towards establishment: Creating responsive and accountable Clinical Commissioning Groups 2012.

8. Mulgan R. 'Accountability': an ever-expanding concept? *Public Administration* 2000;78(3):555.
9. Ryan C, Walsh P. Collaboration of public sector agencies: reporting and accountability challenges. *International Journal of Public Sector Management* 2004;17(7):621-31.
10. Hood C. A public management for all seasons? *Public Administration* 1991;69(1):3-19.
11. Bovens M. Analysing and Assessing Accountability: A Conceptual Framework1. *European Law Journal* 2007;13(4):447-68.
12. Brinkerhoff DW. Accountability and health systems: toward conceptual clarity and policy relevance. *Health Policy and Planning* 2004;19(6):371-79.
13. Friedman A. Beyond accountability for reasonableness. *Bioethics* 2008;22(2):101-12.
14. Yamin AE. Beyond Compassion: The Central Role of Accountability in Applying a Human Rights Framework to Health. *Health and Human Rights* 2008;10(2).
15. Leat D. *Voluntary organisations and accountability*. London: Policy Analysis Unit, National Council For Voluntary Organisations, 1988.
16. Day P, Klein R. *Accountabilities: five public services*. London and New York: Tavistock, 1987.
17. Miller R, Peckham S, Checkland K, Coleman A, McDermott I, Harrison S, et al. Clinical engagement in primary care-led commissioning: a review of the evidence. London: Policy Research Unit in Commissioning and the Healthcare System (PRUComm), 2012.
18. Department of Health. The Functions of GP Commissioning Consortia. A Working Document. *Gateway ref 15472*, 2011.
19. Coleman A, Harrison S. What next for health scrutiny? *Journal of Integrated Care* 2013;21(2):54-63.
20. Checkland K, Coleman A, Segar J, McDermott I, Miller R, Wallace A, et al. Exploring the early workings of emerging Clinical Commissioning Groups: Final report. . London: Policy Research Unit in Commissioning and the Healthcare System (PRUComm), , 2012.
21. NHS Commissioning Board. Model CCG Constitution Framework, 2012.
22. Department of Health. The Mandate: a mandate from the Government to the NHS Commissioning Board. London: The Stationary Office, 2012.
23. NHS Commissioning Board. Quality Premium: 2013/14 guidance for CCGs. Draft, 2012.
24. McLellan A. Lansley expects 'nearly all' CCGs to be authorised by deadline. *Health Service Journal* 2012;14th June 2012.
25. Department of Health. Developing Clinical Commissioning Groups: towards authorisation. London: The Stationary Office, Gateway Reference 16367, 2011.
26. Kaffash J. Revealed: CCG targets for quality premium. *Pulse* 2012;18th Dec 2012.
27. NHS Commissioning Board. Clinical commissioning group governing body members: role outlines, attributes and skills. *October 2012*, 2012.
28. Coleman A, Checkland K, Segar J, McDermott I, Harrison S, Peckham S. Joining it up? Health and Wellbeing in the new English National Health Service organisation: Early evidence from Clinical Commissioning Groups and shadow Health and Wellbeing Boards. *Local Government Studies* In press.
29. Department of Health. Government response to the NHS Future Forum report *CM8113*, 2011.
30. NHS Commissioning Board. Clinical Commissioning Groups HR Guide. *May 2012*, 2012.
31. Iacobucci G. CCGs ramp up performance management of GPs as thousands sign inter-practice agreements. *Pulse* 2012;23rd June 2012.

1  
2  
3  
4  
5  
6  
7  
8  
9  
10  
11  
12  
13  
14  
15  
16  
17  
18  
19  
20  
21  
22  
23  
24  
25  
26  
27  
28  
29  
30  
31  
32  
33  
34  
35  
36  
37  
38  
39  
40  
41  
42  
43  
44  
45  
46  
47  
48  
49  
50  
51  
52  
53  
54  
55  
56  
57  
58  
59  
60

32. Dixon A, Storey J, Alvarez Rosete A. Accountability of Foundation Trusts in the English NHS: Views of Directors and Governors. *Journal of Health Services Research & Policy* 2010;15(2):82-89.

33. Davies A. Tangled Web - Accountability and the Commissioning Role in the New NHS. *King's College Law Journal* 2007;18(3):393.

34. NHS Commissioning Board. Clinical commissioning group authorisation: Draft guide for applicants. *April 2012*, 2012.

35. Sampson, F. (2012). Hail to the Chief?—How far does the Introduction of Elected Police Commissioners Herald a US-Style Politicization of Policing for the UK? *Policing* 6(1): 4-15.

36. Macfarlane F, Exworthy M, Wilmott M, Greenhalgh T. Plus ça change, plus c'est la même chose: senior NHS managers' narratives of restructuring. *Sociology of Health & Illness* 2011;33(6):914-29.

37. Bevan G, Hamblin R. Hitting and missing targets by ambulance services for emergency calls: effects of different systems of performance measurement within the UK. *Journal of the Royal Statistical Society* 2009;172(1):161(30).

South, J. (2004). Rising to the challenge: a study of patient and public involvement in four primary care trusts. *Primary Health Care Research & Development* 5(02): 125-134

38. Davies ACL. This Time, it's for Real: The Health and Social Care Act 2012. *The Modern Law Review* 2013;76(3):564-88.

## Glossary

NHS – National Health Service

NHS England – formally known as NHS Commissioning Board

CCGs – Clinical Commissioning Groups

AO –Accountable Officer – CCG lead holding overall responsibility for CCG performance. May be a manager or a General Practitioner

PCTs – Primary Care Trusts (previously responsible for commissioning care)

CSU – Commissioning Support Unit – responsible for providing managerial support for commissioning

LA – Local Authority (local elected government)

HWB – Health and Wellbeing Boards – committee of LA, responsible for overseeing strategy relating to health and wellbeing

Formatted: Font: (Default) Times New Roman, 12 pt

Formatted: Line spacing: single

Formatted: Font: (Default) Times New Roman, 12 pt

Formatted: Font: (Default) Times New Roman, 12 pt, Italic, No underline

Formatted: Font: (Default) Times New Roman, 12 pt

Formatted: Font: Italic, Underline

Formatted: Font: (Default) Times New Roman, 12 pt, Bold, Underline, Do not check spelling or grammar

Formatted: Space After: 0 pt, Line spacing: Double

Formatted: Font: Not Bold, No underline

Formatted: Font: (Default) Times New Roman, 12 pt, Do not check spelling or grammar

Formatted: Indent: Left: 0", Hanging: 0.59", Space After: 0 pt, Line spacing: Double

Formatted: Space After: 0 pt, Line spacing: Double

Formatted: Indent: Left: 0", Hanging: 0.59", Space After: 0 pt, Line spacing: Double

Formatted: Space After: 0 pt, Line spacing: Double

Formatted: Indent: Left: 0", Hanging: 0.59", Space After: 0 pt, Line spacing: Double

1  
2  
3  
4  
5  
6  
7  
8  
9  
10  
11  
12  
13  
14  
15  
16  
17  
18  
19  
20  
21  
22  
23  
24  
25  
26  
27  
28  
29  
30  
31  
32  
33  
34  
35  
36  
37  
38  
39  
40  
41  
42  
43  
44  
45  
46  
47  
48  
49  
50  
51  
52  
53  
54  
55  
56  
57  
58  
59  
60

[HSCA – Health and Social Care Act – Act of Parliament which brought about the reorganisation](#)

**Formatted:** Space After: 0 pt, Line spacing: Double

[OSC- Overview and Scrutiny Committee of the LA, responsible for scrutinising changes to local services](#)

**Formatted:** Indent: Left: 0", Hanging: 0.59", Space After: 0 pt, Line spacing: Double

[DH – Department of Health – Government department responsible for health](#)

**Formatted:** Space After: 0 pt, Line spacing: Double

[LMC – Local Medical Committee – local representative body for General Practitioners](#)

**Formatted:** Font: (Default) Times New Roman, 12 pt, Do not check spelling or grammar

For peer review only

1  
2  
3  
4  
5  
6  
7  
8  
9  
10  
11  
12  
13  
14  
15  
16  
17  
18  
19  
20  
21  
22  
23  
24  
25  
26  
27  
28  
29  
30  
31  
32  
33  
34  
35  
36  
37  
38  
39  
40  
41  
42  
43  
44  
45  
46  
47  
48  
49  
50  
51  
52  
53  
54  
55  
56  
57  
58  
59  
60

For peer review only

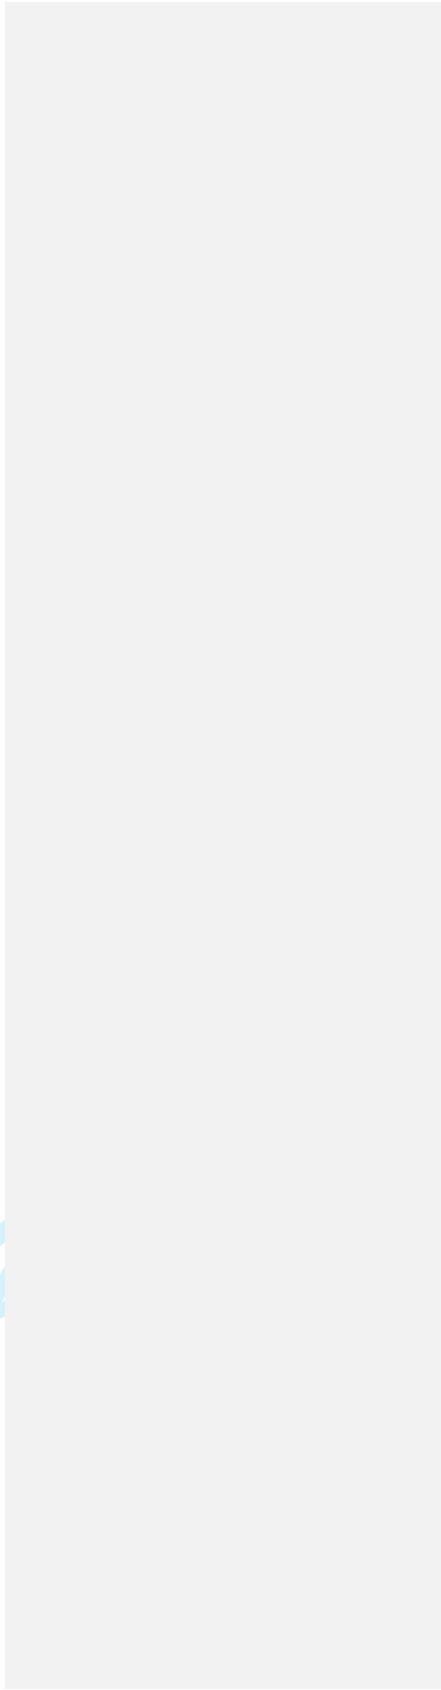

Supplement: bmjopen-2013-003769.draft_revisions.pdf [file bmjopen-2013-003769.draft_revisions.pdf]
